# Supplementary material for: Synthesis and structural characterization of mixed-metal Pt–Rh clusters. Assembly of tetra- and tetra-hexanuclear clusters from smaller metal fragments
Source: Royal Society of Chemistry journal article supplement (doi:10.1039/b200003b), 2002-01-01
Supplement: b200003b.doc [file b200003b.doc]

# Supporting Information for:

**Synthesis and Structural Characterization of Mixed-metal Pt-Rh clusters. Assembly of Tetra- and Tetra-hexanuclear Clusters from Smaller Metal Fragments.**

I. O. Koshevoy,a Sergey P. Tunik,*a Sirpa Jääskeläinen,b Matti Haukka,b Tapani A. Pakkanen,b and Ivan S. Podkorytovc

*a St. Petersburg University, Department of Chemistry, Universitetskii pr., 2, St. Petersburg, 198904, Russia*

*b Department of Chemistry, University of Joensuu, P.O. Box 111, FIN-80101, Joensuu, Finland*

*c S.V. Lebedev Central Synthetic Rubber Research Institute, Gapsalskaya 1, St. Petersburg, 198035, Russia.*

**Tables S1-S6:** Crystallographic data, atomic coordinates, bond lengths and bond angles, anisotropic displacement parameters, hydrogen coordinates, and isotropic displacement parameters, and torsion angles for structure **1a**.

**Tables S7-S12:** Crystallographic data, atomic coordinates, bond lengths and bond angles, anisotropic displacement parameters, hydrogen coordinates, and isotropic displacement parameters, and torsion angles for structure **1b**.

**Table S1.** Crystal data and structure refinement for structure 1a.

| Identification code | structure 1a |  |
| --- | --- | --- |
| Empirical formula | C56H44O6P4Pt2Rh2 |  |
| Formula weight | 1532.79 |  |
| Temperature | 150(2) K |  |
| Wavelength | 0.71073 Å |  |
| Crystal system | Triclinic |  |
| Space group | P-1 |  |
| Unit cell dimensions | a = 11.8198(4) Å | = 104.370(2)°. |
|  | b = 12.5681(5) Å | = 92.9790(10)°. |
|  | c = 18.0603(7) Å |  = 95.5950(10)°. |
| Volume | 2578.49(17) Å3 |  |
| Z | 2 |  |
| Density (calculated) | 1.974 Mg/m3 |  |
| Absorption coefficient | 6.212 mm-1 |  |
| F(000) | 1468 |  |
| Crystal size | 0.30 x 0.20 x 0.20 mm3 |  |
| Theta range for data collection | 2.80 to 27.43°. |  |
| Index ranges | -14<=h<=15, -16<=k<=15, -23<=l<=23 |  |
| Reflections collected | 30924 |  |
| Independent reflections | 10456 [R(int) = 0.0341] |  |
| Completeness to theta = 27.43° | 88.9 % |  |
| Absorption correction | Semi-empirical from equivalents |  |
| Max. and min. transmission | 0.39367 and 0.28856 |  |
| Refinement method | Full-matrix least-squares on F2 |  |
| Data / restraints / parameters | 10456 / 0 / 631 |  |
| Goodness-of-fit on F2 | 1.128 |  |
| Final R indices [I>2sigma(I)] | R1 = 0.0342, wR2 = 0.0742 |  |
| R indices (all data) | R1 = 0.0437, wR2 = 0.0783 |  |
| Largest diff. peak and hole | 1.650 and -1.647 e.Å-3 |  |

**Table S2.** Atomic coordinates ( x 104) and equivalent isotropic displacement parameters (Å2x 103)

for structure 1a. U(eq) is defined as one third of the trace of the orthogonalized Uij tensor.

________________________________________________________________________________

x y z U(eq)

________________________________________________________________________________

Pt(1) 4820(1) 4201(1) 2780(1) 24(1)

Pt(2) 2373(1) 3632(1) 2399(1) 18(1)

Rh(1) 3647(1) 2322(1) 2949(1) 19(1)

Rh(2) 3876(1) 2645(1) 1525(1) 19(1)

P(1) 2179(1) 2020(1) 3685(1) 21(1)

P(2) 1304(1) 4103(1) 3406(1) 21(1)

P(3) 1857(1) 4655(1) 1581(1) 19(1)

P(4) 2644(1) 2696(1) 526(1) 19(1)

C(1) 5844(6) 5480(5) 3194(4) 43(2)

O(1) 6476(5) 6228(5) 3434(4) 73(2)

C(2) 4527(5) 3668(5) 3764(3) 30(1)

O(2) 4776(4) 3930(4) 4410(2) 43(1)

C(3) 4772(5) 4159(5) 1612(3) 29(1)

O(3) 5097(4) 4719(4) 1228(3) 41(1)

C(4) 3079(5) 1295(4) 1860(3) 23(1)

O(4) 2664(4) 408(3) 1579(2) 30(1)

C(5) 4999(5) 1856(5) 966(4) 35(1)

O(5) 5668(5) 1405(5) 617(3) 59(1)

C(6) 4682(5) 1336(4) 3136(3) 26(1)

O(6) 5324(4) 754(4) 3237(3) 49(1)

C(7) 1585(5) 3312(4) 4123(3) 24(1)

C(8) 976(5) 996(4) 3229(3) 24(1)

C(9) -159(5) 1188(5) 3221(3) 30(1)

C(10) -1005(6) 338(6) 2864(4) 38(2)

C(11) -728(6) -705(6) 2529(3) 39(2)

C(12) 391(6) -901(5) 2555(3) 39(2)

C(13) 1258(6) -62(5) 2901(3) 34(1)

C(14) 2473(5) 1530(5) 4549(3) 27(1)

C(15) 1597(6) 1202(6) 4934(3) 39(2)

C(16) 1796(6) 822(6) 5595(4) 46(2)

C(17) 2896(6) 800(5) 5866(3) 40(2)

C(18) 3787(7) 1129(6) 5485(4) 47(2)

C(19) 3591(6) 1503(5) 4828(3) 36(1)

C(20) -245(5) 3832(5) 3227(3) 26(1)

C(21) -691(5) 3259(4) 2496(3) 25(1)

C(22) -1836(5) 2900(5) 2339(4) 32(1)

C(23) -2555(5) 3131(6) 2929(4) 39(2)

C(24) -2137(6) 3711(6) 3655(4) 44(2)

C(25) -986(5) 4060(5) 3810(3) 34(1)

C(26) 1588(5) 5542(5) 3961(3) 27(1)

C(27) 2674(6) 5939(5) 4324(3) 37(2)

C(28) 2985(7) 7040(5) 4671(4) 44(2)

C(29) 2198(8) 7789(6) 4648(4) 58(2)

C(30) 1121(7) 7425(6) 4287(4) 52(2)

C(31) 809(6) 6309(5) 3952(4) 39(2)

C(32) 2299(5) 4117(4) 603(3) 21(1)

C(33) 360(5) 4889(4) 1454(3) 23(1)

C(34) -427(5) 4175(5) 905(3) 28(1)

C(35) -1573(5) 4305(5) 928(3) 34(1)

C(36) -1957(5) 5133(5) 1477(4) 37(2)

C(37) -1184(5) 5862(5) 2004(4) 37(2)

C(38) -36(5) 5747(5) 1993(3) 31(1)

C(40) 2537(5) 6072(4) 1833(3) 24(1)

C(41) 2468(5) 6724(5) 1308(3) 33(1)

C(42) 2935(5) 7799(5) 1493(4) 37(2)

C(43) 3469(5) 8278(5) 2221(4) 37(2)

C(44) 3544(5) 7644(5) 2741(4) 37(2)

C(45) 3107(5) 6541(5) 2549(3) 29(1)

C(46) 1207(5) 1956(4) 356(3) 21(1)

C(47) 644(5) 1617(4) 930(3) 23(1)

C(48) -488(5) 1160(4) 801(3) 28(1)

C(49) -1071(5) 1044(5) 95(3) 30(1)

C(50) -523(5) 1369(5) -492(3) 29(1)

C(51) 602(5) 1819(4) -362(3) 26(1)

C(52) 3169(4) 2260(4) -424(3) 22(1)

C(53) 3215(5) 1134(5) -723(3) 33(1)

C(54) 3563(5) 737(5) -1459(3) 33(1)

C(55) 3877(5) 1475(5) -1884(3) 33(1)

C(56) 3885(6) 2584(5) -1573(4) 41(2)

C(57) 3538(5) 2982(5) -846(3) 30(1)

________________________________________________________________________________

**Table S3.** Bond lengths [Å] and angles [°] for structure 1a.

Pt(1)-C(1) 1.880(7)

Pt(1)-C(2) 2.081(6)

Pt(1)-C(3) 2.096(6)

Pt(1)-Rh(2) 2.7055(4)

Pt(1)-Rh(1) 2.7126(4)

Pt(1)-Pt(2) 2.9148(3)

Pt(2)-P(2) 2.2600(13)

Pt(2)-P(3) 2.2821(13)

Pt(2)-Rh(2) 2.6336(4)

Pt(2)-Rh(1) 2.6657(4)

Rh(1)-C(6) 1.899(6)

Rh(1)-C(2) 2.091(6)

Rh(1)-C(4) 2.102(5)

Rh(1)-P(1) 2.2984(14)

Rh(1)-Rh(2) 2.7243(6)

Rh(2)-C(5) 1.914(6)

Rh(2)-C(3) 2.052(6)

Rh(2)-C(4) 2.094(5)

Rh(2)-P(4) 2.2775(14)

P(1)-C(8) 1.831(6)

P(1)-C(7) 1.842(5)

P(1)-C(14) 1.843(5)

P(2)-C(20) 1.826(6)

P(2)-C(26) 1.826(6)

P(2)-C(7) 1.853(5)

P(3)-C(40) 1.818(5)

P(3)-C(33) 1.833(6)

P(3)-C(32) 1.851(5)

P(4)-C(52) 1.827(5)

P(4)-C(46) 1.828(5)

P(4)-C(32) 1.844(5)

C(1)-O(1) 1.121(8)

C(2)-O(2) 1.145(7)

C(3)-O(3) 1.157(7)

C(4)-O(4) 1.153(6)

C(5)-O(5) 1.143(7)

C(6)-O(6) 1.142(7)

C(7)-H(7A) 0.9900

C(7)-H(7B) 0.9900

C(8)-C(9) 1.385(8)

C(8)-C(13) 1.395(8)

C(9)-C(10) 1.393(8)

C(9)-H(9) 0.9500

C(10)-C(11) 1.379(10)

C(10)-H(10) 0.9500

C(11)-C(12) 1.370(10)

C(11)-H(11) 0.9500

C(12)-C(13) 1.395(9)

C(12)-H(12) 0.9500

C(13)-H(13) 0.9500

C(14)-C(15) 1.365(9)

C(14)-C(19) 1.395(8)

C(15)-C(16) 1.407(8)

C(15)-H(15) 0.9500

C(16)-C(17) 1.372(10)

C(16)-H(16) 0.9500

C(17)-C(18) 1.373(10)

C(17)-H(17) 0.9500

C(18)-C(19) 1.399(8)

C(18)-H(18) 0.9500

C(19)-H(19) 0.9500

C(20)-C(21) 1.386(8)

C(20)-C(25) 1.397(8)

C(21)-C(22) 1.376(8)

C(21)-H(21) 0.9500

C(22)-C(23) 1.388(9)

C(22)-H(22) 0.9500

C(23)-C(24) 1.372(10)

C(23)-H(23) 0.9500

C(24)-C(25) 1.380(9)

C(24)-H(24) 0.9500

C(25)-H(25) 0.9500

C(26)-C(27) 1.397(9)

C(26)-C(31) 1.398(8)

C(27)-C(28) 1.374(9)

C(27)-H(27) 0.9500

C(28)-C(29) 1.393(11)

C(28)-H(28) 0.9500

C(29)-C(30) 1.381(11)

C(29)-H(29) 0.9500

C(30)-C(31) 1.387(10)

C(30)-H(30) 0.9500

C(31)-H(31) 0.9500

C(32)-H(32A) 0.9900

C(32)-H(32B) 0.9900

C(33)-C(38) 1.398(8)

C(33)-C(34) 1.398(8)

C(34)-C(35) 1.381(8)

C(34)-H(34) 0.9500

C(35)-C(36) 1.378(9)

C(35)-H(35) 0.9500

C(36)-C(37) 1.377(9)

C(36)-H(36) 0.9500

C(37)-C(38) 1.379(9)

C(37)-H(37) 0.9500

C(38)-H(38) 0.9500

C(40)-C(45) 1.388(8)

C(40)-C(41) 1.404(8)

C(41)-C(42) 1.361(8)

C(41)-H(41) 0.9500

C(42)-C(43) 1.392(9)

C(42)-H(42) 0.9500

C(43)-C(44) 1.380(9)

C(43)-H(43) 0.9500

C(44)-C(45) 1.383(8)

C(44)-H(44) 0.9500

C(45)-H(45) 0.9500

C(46)-C(47) 1.390(7)

C(46)-C(51) 1.410(7)

C(47)-C(48) 1.388(8)

C(47)-H(47) 0.9500

C(48)-C(49) 1.384(8)

C(48)-H(48) 0.9500

C(49)-C(50) 1.394(8)

C(49)-H(49) 0.9500

C(50)-C(51) 1.379(8)

C(50)-H(50) 0.9500

C(51)-H(51) 0.9500

C(52)-C(57) 1.377(7)

C(52)-C(53) 1.392(8)

C(53)-C(54) 1.397(8)

C(53)-H(53) 0.9500

C(54)-C(55) 1.379(8)

C(54)-H(54) 0.9500

C(55)-C(56) 1.366(9)

C(55)-H(55) 0.9500

C(56)-C(57) 1.383(8)

C(56)-H(56) 0.9500

C(57)-H(57) 0.9500

C(1)-Pt(1)-C(2) 100.6(3)

C(1)-Pt(1)-C(3) 100.7(3)

C(2)-Pt(1)-C(3) 158.5(2)

C(1)-Pt(1)-Rh(2) 148.3(2)

C(2)-Pt(1)-Rh(2) 109.94(16)

C(3)-Pt(1)-Rh(2) 48.58(16)

C(1)-Pt(1)-Rh(1) 149.6(2)

C(2)-Pt(1)-Rh(1) 49.60(16)

C(3)-Pt(1)-Rh(1) 108.93(16)

Rh(2)-Pt(1)-Rh(1) 60.372(12)

C(1)-Pt(1)-Pt(2) 137.9(2)

C(2)-Pt(1)-Pt(2) 85.30(16)

C(3)-Pt(1)-Pt(2) 81.20(16)

Rh(2)-Pt(1)-Pt(2) 55.734(10)

Rh(1)-Pt(1)-Pt(2) 56.411(10)

P(2)-Pt(2)-P(3) 105.32(5)

P(2)-Pt(2)-Rh(2) 159.78(4)

P(3)-Pt(2)-Rh(2) 94.90(4)

P(2)-Pt(2)-Rh(1) 97.99(4)

P(3)-Pt(2)-Rh(1) 156.17(4)

Rh(2)-Pt(2)-Rh(1) 61.870(13)

P(2)-Pt(2)-Pt(1) 114.26(4)

P(3)-Pt(2)-Pt(1) 106.56(4)

Rh(2)-Pt(2)-Pt(1) 58.104(11)

Rh(1)-Pt(2)-Pt(1) 57.962(10)

C(6)-Rh(1)-C(2) 92.9(2)

C(6)-Rh(1)-C(4) 92.5(2)

C(2)-Rh(1)-C(4) 158.1(2)

C(6)-Rh(1)-P(1) 103.00(18)

C(2)-Rh(1)-P(1) 96.28(17)

C(4)-Rh(1)-P(1) 103.13(15)

C(6)-Rh(1)-Pt(2) 167.90(17)

C(2)-Rh(1)-Pt(2) 91.83(16)

C(4)-Rh(1)-Pt(2) 79.13(14)

P(1)-Rh(1)-Pt(2) 87.52(4)

C(6)-Rh(1)-Pt(1) 109.78(17)

C(2)-Rh(1)-Pt(1) 49.30(16)

C(4)-Rh(1)-Pt(1) 109.06(14)

P(1)-Rh(1)-Pt(1) 132.19(4)

Pt(2)-Rh(1)-Pt(1) 65.627(11)

C(6)-Rh(1)-Rh(2) 109.42(17)

C(2)-Rh(1)-Rh(2) 108.95(17)

C(4)-Rh(1)-Rh(2) 49.40(14)

P(1)-Rh(1)-Rh(2) 137.18(4)

Pt(2)-Rh(1)-Rh(2) 58.485(12)

Pt(1)-Rh(1)-Rh(2) 59.684(12)

C(5)-Rh(2)-C(3) 93.2(3)

C(5)-Rh(2)-C(4) 96.0(2)

C(3)-Rh(2)-C(4) 159.6(2)

C(5)-Rh(2)-P(4) 99.28(19)

C(3)-Rh(2)-P(4) 95.86(17)

C(4)-Rh(2)-P(4) 100.56(15)

C(5)-Rh(2)-Pt(2) 174.48(18)

C(3)-Rh(2)-Pt(2) 89.34(16)

C(4)-Rh(2)-Pt(2) 80.03(15)

P(4)-Rh(2)-Pt(2) 85.29(4)

C(5)-Rh(2)-Pt(1) 112.0(2)

C(3)-Rh(2)-Pt(1) 50.00(16)

C(4)-Rh(2)-Pt(1) 109.56(14)

P(4)-Rh(2)-Pt(1) 133.01(4)

Pt(2)-Rh(2)-Pt(1) 66.162(11)

C(5)-Rh(2)-Rh(1) 114.85(18)

C(3)-Rh(2)-Rh(1) 109.92(16)

C(4)-Rh(2)-Rh(1) 49.64(14)

P(4)-Rh(2)-Rh(1) 134.92(4)

Pt(2)-Rh(2)-Rh(1) 59.645(12)

Pt(1)-Rh(2)-Rh(1) 59.943(12)

C(8)-P(1)-C(7) 107.1(3)

C(8)-P(1)-C(14) 99.0(2)

C(7)-P(1)-C(14) 99.8(2)

C(8)-P(1)-Rh(1) 117.75(17)

C(7)-P(1)-Rh(1) 111.61(18)

C(14)-P(1)-Rh(1) 119.4(2)

C(20)-P(2)-C(26) 105.5(3)

C(20)-P(2)-C(7) 101.9(2)

C(26)-P(2)-C(7) 103.5(2)

C(20)-P(2)-Pt(2) 118.05(18)

C(26)-P(2)-Pt(2) 115.00(19)

C(7)-P(2)-Pt(2) 111.24(18)

C(40)-P(3)-C(33) 100.4(2)

C(40)-P(3)-C(32) 102.1(2)

C(33)-P(3)-C(32) 105.6(2)

C(40)-P(3)-Pt(2) 114.43(18)

C(33)-P(3)-Pt(2) 119.72(17)

C(32)-P(3)-Pt(2) 112.47(17)

C(52)-P(4)-C(46) 100.9(2)

C(52)-P(4)-C(32) 104.8(2)

C(46)-P(4)-C(32) 99.9(2)

C(52)-P(4)-Rh(2) 115.39(17)

C(46)-P(4)-Rh(2) 122.76(17)

C(32)-P(4)-Rh(2) 110.70(17)

O(1)-C(1)-Pt(1) 178.3(7)

O(2)-C(2)-Pt(1) 139.9(5)

O(2)-C(2)-Rh(1) 138.8(5)

Pt(1)-C(2)-Rh(1) 81.1(2)

O(3)-C(3)-Rh(2) 140.4(5)

O(3)-C(3)-Pt(1) 138.2(5)

Rh(2)-C(3)-Pt(1) 81.4(2)

O(4)-C(4)-Rh(2) 138.6(4)

O(4)-C(4)-Rh(1) 140.0(4)

Rh(2)-C(4)-Rh(1) 81.0(2)

O(5)-C(5)-Rh(2) 178.0(6)

O(6)-C(6)-Rh(1) 178.2(6)

P(1)-C(7)-P(2) 111.3(3)

P(1)-C(7)-H(7A) 109.4

P(2)-C(7)-H(7A) 109.4

P(1)-C(7)-H(7B) 109.4

P(2)-C(7)-H(7B) 109.4

H(7A)-C(7)-H(7B) 108.0

C(9)-C(8)-C(13) 119.5(5)

C(9)-C(8)-P(1) 125.1(4)

C(13)-C(8)-P(1) 115.3(4)

C(8)-C(9)-C(10) 120.0(6)

C(8)-C(9)-H(9) 120.0

C(10)-C(9)-H(9) 120.0

C(11)-C(10)-C(9) 120.6(6)

C(11)-C(10)-H(10) 119.7

C(9)-C(10)-H(10) 119.7

C(12)-C(11)-C(10) 119.3(6)

C(12)-C(11)-H(11) 120.4

C(10)-C(11)-H(11) 120.4

C(11)-C(12)-C(13) 121.3(6)

C(11)-C(12)-H(12) 119.3

C(13)-C(12)-H(12) 119.3

C(8)-C(13)-C(12) 119.2(6)

C(8)-C(13)-H(13) 120.4

C(12)-C(13)-H(13) 120.4

C(15)-C(14)-C(19) 118.8(5)

C(15)-C(14)-P(1) 120.3(5)

C(19)-C(14)-P(1) 120.9(5)

C(14)-C(15)-C(16) 121.6(6)

C(14)-C(15)-H(15) 119.2

C(16)-C(15)-H(15) 119.2

C(17)-C(16)-C(15) 119.3(6)

C(17)-C(16)-H(16) 120.4

C(15)-C(16)-H(16) 120.4

C(16)-C(17)-C(18) 119.8(6)

C(16)-C(17)-H(17) 120.1

C(18)-C(17)-H(17) 120.1

C(17)-C(18)-C(19) 120.9(7)

C(17)-C(18)-H(18) 119.5

C(19)-C(18)-H(18) 119.5

C(14)-C(19)-C(18) 119.6(6)

C(14)-C(19)-H(19) 120.2

C(18)-C(19)-H(19) 120.2

C(21)-C(20)-C(25) 118.7(5)

C(21)-C(20)-P(2) 118.0(4)

C(25)-C(20)-P(2) 122.9(4)

C(22)-C(21)-C(20) 121.4(5)

C(22)-C(21)-H(21) 119.3

C(20)-C(21)-H(21) 119.3

C(21)-C(22)-C(23) 118.8(6)

C(21)-C(22)-H(22) 120.6

C(23)-C(22)-H(22) 120.6

C(24)-C(23)-C(22) 120.9(6)

C(24)-C(23)-H(23) 119.5

C(22)-C(23)-H(23) 119.5

C(23)-C(24)-C(25) 120.0(6)

C(23)-C(24)-H(24) 120.0

C(25)-C(24)-H(24) 120.0

C(24)-C(25)-C(20) 120.2(6)

C(24)-C(25)-H(25) 119.9

C(20)-C(25)-H(25) 119.9

C(27)-C(26)-C(31) 117.8(6)

C(27)-C(26)-P(2) 119.3(4)

C(31)-C(26)-P(2) 122.3(5)

C(28)-C(27)-C(26) 122.2(6)

C(28)-C(27)-H(27) 118.9

C(26)-C(27)-H(27) 118.9

C(27)-C(28)-C(29) 118.9(7)

C(27)-C(28)-H(28) 120.5

C(29)-C(28)-H(28) 120.5

C(30)-C(29)-C(28) 120.3(7)

C(30)-C(29)-H(29) 119.9

C(28)-C(29)-H(29) 119.9

C(29)-C(30)-C(31) 120.3(7)

C(29)-C(30)-H(30) 119.8

C(31)-C(30)-H(30) 119.8

C(30)-C(31)-C(26) 120.5(7)

C(30)-C(31)-H(31) 119.8

C(26)-C(31)-H(31) 119.8

P(4)-C(32)-P(3) 107.4(3)

P(4)-C(32)-H(32A) 110.2

P(3)-C(32)-H(32A) 110.2

P(4)-C(32)-H(32B) 110.2

P(3)-C(32)-H(32B) 110.2

H(32A)-C(32)-H(32B) 108.5

C(38)-C(33)-C(34) 118.5(5)

C(38)-C(33)-P(3) 117.9(4)

C(34)-C(33)-P(3) 123.1(4)

C(35)-C(34)-C(33) 119.6(5)

C(35)-C(34)-H(34) 120.2

C(33)-C(34)-H(34) 120.2

C(36)-C(35)-C(34) 121.3(6)

C(36)-C(35)-H(35) 119.4

C(34)-C(35)-H(35) 119.4

C(37)-C(36)-C(35) 119.6(6)

C(37)-C(36)-H(36) 120.2

C(35)-C(36)-H(36) 120.2

C(36)-C(37)-C(38) 120.1(6)

C(36)-C(37)-H(37) 120.0

C(38)-C(37)-H(37) 120.0

C(37)-C(38)-C(33) 120.9(6)

C(37)-C(38)-H(38) 119.5

C(33)-C(38)-H(38) 119.5

C(45)-C(40)-C(41) 118.6(5)

C(45)-C(40)-P(3) 121.2(4)

C(41)-C(40)-P(3) 120.1(4)

C(42)-C(41)-C(40) 121.2(6)

C(42)-C(41)-H(41) 119.4

C(40)-C(41)-H(41) 119.4

C(41)-C(42)-C(43) 120.0(6)

C(41)-C(42)-H(42) 120.0

C(43)-C(42)-H(42) 120.0

C(44)-C(43)-C(42) 119.2(6)

C(44)-C(43)-H(43) 120.4

C(42)-C(43)-H(43) 120.4

C(43)-C(44)-C(45) 121.2(6)

C(43)-C(44)-H(44) 119.4

C(45)-C(44)-H(44) 119.4

C(44)-C(45)-C(40) 119.7(6)

C(44)-C(45)-H(45) 120.2

C(40)-C(45)-H(45) 120.2

C(47)-C(46)-C(51) 118.5(5)

C(47)-C(46)-P(4) 122.5(4)

C(51)-C(46)-P(4) 118.7(4)

C(48)-C(47)-C(46) 120.8(5)

C(48)-C(47)-H(47) 119.6

C(46)-C(47)-H(47) 119.6

C(49)-C(48)-C(47) 119.9(5)

C(49)-C(48)-H(48) 120.1

C(47)-C(48)-H(48) 120.1

C(48)-C(49)-C(50) 120.4(5)

C(48)-C(49)-H(49) 119.8

C(50)-C(49)-H(49) 119.8

C(51)-C(50)-C(49) 119.4(5)

C(51)-C(50)-H(50) 120.3

C(49)-C(50)-H(50) 120.3

C(50)-C(51)-C(46) 121.0(5)

C(50)-C(51)-H(51) 119.5

C(46)-C(51)-H(51) 119.5

C(57)-C(52)-C(53) 118.8(5)

C(57)-C(52)-P(4) 123.7(4)

C(53)-C(52)-P(4) 117.4(4)

C(52)-C(53)-C(54) 120.6(5)

C(52)-C(53)-H(53) 119.7

C(54)-C(53)-H(53) 119.7

C(55)-C(54)-C(53) 119.3(5)

C(55)-C(54)-H(54) 120.4

C(53)-C(54)-H(54) 120.4

C(56)-C(55)-C(54) 120.0(5)

C(56)-C(55)-H(55) 120.0

C(54)-C(55)-H(55) 120.0

C(55)-C(56)-C(57) 121.0(6)

C(55)-C(56)-H(56) 119.5

C(57)-C(56)-H(56) 119.5

C(52)-C(57)-C(56) 120.2(5)

C(52)-C(57)-H(57) 119.9

C(56)-C(57)-H(57) 119.9

__________________________________________________________________________________________________

Symmetry transformations used to generate equivalent atoms:

**Table S4.** Anisotropic displacement parameters (Å2x 103)for structure 1a. The anisotropic

displacement factor exponent takes the form: -22[ h2a*2U11 + ... + 2 h k a* b* U12 ]

______________________________________________________________________________

U11 U22 U33 U23 U13 U12

______________________________________________________________________________

Pt(1) 19(1) 19(1) 32(1) 4(1) -2(1) -1(1)

Pt(2) 17(1) 16(1) 20(1) 5(1) 1(1) 3(1)

Rh(1) 18(1) 17(1) 20(1) 5(1) -1(1) 3(1)

Rh(2) 18(1) 18(1) 22(1) 6(1) 3(1) 3(1)

P(1) 23(1) 21(1) 21(1) 7(1) 2(1) 5(1)

P(2) 21(1) 22(1) 20(1) 5(1) 2(1) 7(1)

P(3) 19(1) 16(1) 23(1) 5(1) 1(1) 3(1)

P(4) 20(1) 16(1) 20(1) 5(1) 3(1) 2(1)

C(1) 40(4) 31(4) 54(4) 8(3) 2(3) -3(3)

O(1) 62(4) 45(3) 95(4) -1(3) -9(3) -27(3)

C(2) 30(3) 23(3) 36(3) 4(2) -1(3) 2(2)

O(2) 58(3) 35(3) 28(2) 0(2) -12(2) -7(2)

C(3) 22(3) 30(3) 36(3) 9(2) 4(2) 3(2)

O(3) 37(3) 40(3) 47(3) 21(2) -1(2) -10(2)

C(4) 30(3) 19(3) 22(3) 10(2) 4(2) 7(2)

O(4) 43(3) 19(2) 26(2) 7(2) -6(2) -4(2)

C(5) 30(4) 43(4) 38(3) 17(3) 6(3) 10(3)

O(5) 51(3) 69(4) 66(3) 18(3) 30(3) 36(3)

C(6) 30(3) 20(3) 25(3) 1(2) -5(2) 0(2)

O(6) 48(3) 43(3) 56(3) 9(2) -14(2) 24(2)

C(7) 25(3) 25(3) 22(3) 4(2) 0(2) 3(2)

C(8) 23(3) 26(3) 24(3) 10(2) 3(2) 1(2)

C(9) 24(3) 34(3) 35(3) 20(3) 1(2) -1(2)

C(10) 27(4) 49(4) 43(4) 26(3) 0(3) -5(3)

C(11) 32(4) 48(4) 34(3) 15(3) 2(3) -18(3)

C(12) 47(4) 32(4) 36(3) 8(3) 11(3) -6(3)

C(13) 35(4) 32(3) 33(3) 3(2) 11(3) 1(3)

C(14) 35(3) 24(3) 24(3) 7(2) 0(2) 7(2)

C(15) 35(4) 57(4) 35(3) 26(3) 3(3) 15(3)

C(16) 50(5) 59(5) 39(4) 28(3) 8(3) 17(4)

C(17) 55(5) 42(4) 24(3) 14(3) -6(3) 7(3)

C(18) 50(5) 57(5) 33(3) 16(3) -13(3) 2(3)

C(19) 36(4) 44(4) 27(3) 11(3) -8(3) 0(3)

C(20) 25(3) 28(3) 28(3) 12(2) 4(2) 8(2)

C(21) 20(3) 26(3) 33(3) 13(2) 7(2) 7(2)

C(22) 26(3) 32(3) 42(3) 19(3) -1(3) 2(2)

C(23) 19(3) 50(4) 56(4) 28(3) 4(3) 3(3)

C(24) 25(4) 65(5) 53(4) 28(4) 16(3) 20(3)

C(25) 35(4) 47(4) 26(3) 13(3) 10(2) 17(3)

C(26) 35(3) 25(3) 23(3) 6(2) 7(2) 10(2)

C(27) 49(4) 27(3) 33(3) 6(2) 1(3) 4(3)

C(28) 62(5) 29(4) 34(3) 3(3) -6(3) -6(3)

C(29) 90(7) 27(4) 50(4) -2(3) 4(4) 4(4)

C(30) 74(6) 34(4) 51(4) 6(3) 10(4) 24(4)

C(31) 47(4) 33(4) 38(3) 5(3) 7(3) 16(3)

C(32) 21(3) 22(3) 21(3) 6(2) 4(2) 5(2)

C(33) 20(3) 25(3) 26(3) 12(2) 3(2) 3(2)

C(34) 30(3) 31(3) 24(3) 8(2) 1(2) 4(2)

C(35) 23(3) 41(4) 40(3) 19(3) -5(3) 2(3)

C(36) 23(3) 46(4) 52(4) 23(3) 6(3) 14(3)

C(37) 31(4) 33(4) 52(4) 15(3) 9(3) 15(3)

C(38) 33(4) 24(3) 36(3) 7(2) 5(3) 6(2)

C(40) 17(3) 20(3) 34(3) 7(2) 5(2) 5(2)

C(41) 40(4) 22(3) 37(3) 10(2) -1(3) -3(3)

C(42) 35(4) 22(3) 59(4) 20(3) 2(3) 3(3)

C(43) 25(3) 17(3) 66(4) 7(3) 5(3) -1(2)

C(44) 29(4) 28(3) 45(4) -4(3) -2(3) -2(3)

C(45) 25(3) 29(3) 32(3) 4(2) 1(2) -1(2)

C(46) 21(3) 15(3) 27(3) 8(2) 3(2) 6(2)

C(47) 21(3) 18(3) 28(3) 5(2) 2(2) 1(2)

C(48) 33(3) 23(3) 30(3) 10(2) 9(2) 2(2)

C(49) 21(3) 25(3) 40(3) 3(2) 0(2) -4(2)

C(50) 29(3) 29(3) 28(3) 7(2) -3(2) 3(2)

C(51) 29(3) 23(3) 24(3) 4(2) 3(2) 0(2)

C(52) 17(3) 26(3) 21(3) 6(2) 0(2) 4(2)

C(53) 41(4) 22(3) 34(3) 7(2) 10(3) -2(3)

C(54) 34(4) 27(3) 33(3) 0(2) 7(3) 4(3)

C(55) 29(3) 42(4) 26(3) 4(2) 7(2) 12(3)

C(56) 54(5) 39(4) 36(3) 18(3) 18(3) 12(3)

C(57) 39(4) 21(3) 33(3) 12(2) 10(3) 6(2)

______________________________________________________________________________

**Table S5.** Hydrogen coordinates ( x 104) and isotropic displacement parameters (Å2x 103)

for structure 1a.

________________________________________________________________________________

x y z U(eq)

________________________________________________________________________________

H(7A) 2129 3771 4542 29

H(7B) 865 3135 4347 29

H(9) -359 1900 3459 36

H(10) -1780 478 2851 46

H(11) -1307 -1281 2282 46

H(12) 582 -1623 2334 47

H(13) 2031 -209 2913 41

H(15) 835 1230 4753 47

H(16) 1174 584 5850 55

H(17) 3042 558 6316 48

H(18) 4548 1103 5671 56

H(19) 4214 1738 4572 43

H(21) -195 3110 2095 30

H(22) -2130 2502 1837 38

H(23) -3346 2884 2829 47

H(24) -2640 3873 4051 52

H(25) -697 4455 4314 41

H(27) 3216 5430 4331 44

H(28) 3724 7286 4922 53

H(29) 2402 8553 4882 70

H(30) 592 7941 4267 63

H(31) 61 6064 3715 47

H(32A) 1673 4117 216 25

H(32B) 2975 4587 514 25

H(34) -176 3605 520 34

H(35) -2107 3814 557 40

H(36) -2750 5199 1492 45

H(37) -1441 6446 2377 45

H(38) 492 6259 2355 37

H(41) 2088 6410 814 39

H(42) 2896 8222 1125 44

H(43) 3779 9034 2358 44

H(44) 3903 7971 3240 45

H(45) 3197 6106 2905 35

H(47) 1039 1700 1416 27

H(48) -862 927 1196 33

H(49) -1849 740 10 36

H(50) -923 1281 -977 35

H(51) 976 2040 -761 31

H(53) 3008 631 -425 39

H(54) 3583 -33 -1665 39

H(55) 4087 1212 -2392 39

H(56) 4133 3089 -1861 49

H(57) 3555 3756 -637 36

________________________________________________________________________________

**Table S6.** Torsion angles [°] for structure 1a.

__________________________________________________________________________________________

C(1)-Pt(1)-Pt(2)-P(2) -59.9(3)

C(2)-Pt(1)-Pt(2)-P(2) 40.69(16)

C(3)-Pt(1)-Pt(2)-P(2) -156.07(17)

Rh(2)-Pt(1)-Pt(2)-P(2) 158.73(4)

Rh(1)-Pt(1)-Pt(2)-P(2) 84.13(4)

C(1)-Pt(1)-Pt(2)-P(3) 56.0(3)

C(2)-Pt(1)-Pt(2)-P(3) 156.56(16)

C(3)-Pt(1)-Pt(2)-P(3) -40.20(17)

Rh(2)-Pt(1)-Pt(2)-P(3) -85.40(4)

Rh(1)-Pt(1)-Pt(2)-P(3) -160.00(4)

C(1)-Pt(1)-Pt(2)-Rh(2) 141.4(3)

C(2)-Pt(1)-Pt(2)-Rh(2) -118.03(16)

C(3)-Pt(1)-Pt(2)-Rh(2) 45.20(16)

Rh(1)-Pt(1)-Pt(2)-Rh(2) -74.596(15)

C(1)-Pt(1)-Pt(2)-Rh(1) -144.0(3)

C(2)-Pt(1)-Pt(2)-Rh(1) -43.44(16)

C(3)-Pt(1)-Pt(2)-Rh(1) 119.80(16)

Rh(2)-Pt(1)-Pt(2)-Rh(1) 74.596(15)

P(2)-Pt(2)-Rh(1)-C(6) 176.3(8)

P(3)-Pt(2)-Rh(1)-C(6) -15.8(8)

Rh(2)-Pt(2)-Rh(1)-C(6) -1.9(8)

Pt(1)-Pt(2)-Rh(1)-C(6) -70.1(8)

P(2)-Pt(2)-Rh(1)-C(2) -70.64(17)

P(3)-Pt(2)-Rh(1)-C(2) 97.28(19)

Rh(2)-Pt(2)-Rh(1)-C(2) 111.19(17)

Pt(1)-Pt(2)-Rh(1)-C(2) 43.04(17)

P(2)-Pt(2)-Rh(1)-C(4) 129.44(16)

P(3)-Pt(2)-Rh(1)-C(4) -62.63(17)

Rh(2)-Pt(2)-Rh(1)-C(4) -48.73(15)

Pt(1)-Pt(2)-Rh(1)-C(4) -116.87(15)

P(2)-Pt(2)-Rh(1)-P(1) 25.57(5)

P(3)-Pt(2)-Rh(1)-P(1) -166.51(9)

Rh(2)-Pt(2)-Rh(1)-P(1) -152.60(4)

Pt(1)-Pt(2)-Rh(1)-P(1) 139.25(4)

P(2)-Pt(2)-Rh(1)-Pt(1) -113.68(4)

P(3)-Pt(2)-Rh(1)-Pt(1) 54.24(9)

Rh(2)-Pt(2)-Rh(1)-Pt(1) 68.147(13)

P(2)-Pt(2)-Rh(1)-Rh(2) 178.17(4)

P(3)-Pt(2)-Rh(1)-Rh(2) -13.91(9)

Pt(1)-Pt(2)-Rh(1)-Rh(2) -68.147(13)

C(1)-Pt(1)-Rh(1)-C(6) -63.2(5)

C(2)-Pt(1)-Rh(1)-C(6) -76.2(3)

C(3)-Pt(1)-Rh(1)-C(6) 102.9(2)

Rh(2)-Pt(1)-Rh(1)-C(6) 101.48(17)

Pt(2)-Pt(1)-Rh(1)-C(6) 167.91(17)

C(1)-Pt(1)-Rh(1)-C(2) 13.0(5)

C(3)-Pt(1)-Rh(1)-C(2) 179.1(3)

Rh(2)-Pt(1)-Rh(1)-C(2) 177.7(2)

Pt(2)-Pt(1)-Rh(1)-C(2) -115.9(2)

C(1)-Pt(1)-Rh(1)-C(4) -163.2(5)

C(2)-Pt(1)-Rh(1)-C(4) -176.2(3)

C(3)-Pt(1)-Rh(1)-C(4) 2.9(2)

Rh(2)-Pt(1)-Rh(1)-C(4) 1.51(16)

Pt(2)-Pt(1)-Rh(1)-C(4) 67.94(16)

C(1)-Pt(1)-Rh(1)-P(1) 67.2(4)

C(2)-Pt(1)-Rh(1)-P(1) 54.2(2)

C(3)-Pt(1)-Rh(1)-P(1) -126.70(18)

Rh(2)-Pt(1)-Rh(1)-P(1) -128.08(5)

Pt(2)-Pt(1)-Rh(1)-P(1) -61.65(5)

C(1)-Pt(1)-Rh(1)-Pt(2) 128.9(4)

C(2)-Pt(1)-Rh(1)-Pt(2) 115.9(2)

C(3)-Pt(1)-Rh(1)-Pt(2) -65.05(17)

Rh(2)-Pt(1)-Rh(1)-Pt(2) -66.430(12)

C(1)-Pt(1)-Rh(1)-Rh(2) -164.7(4)

C(2)-Pt(1)-Rh(1)-Rh(2) -177.7(2)

C(3)-Pt(1)-Rh(1)-Rh(2) 1.39(17)

Pt(2)-Pt(1)-Rh(1)-Rh(2) 66.430(12)

P(2)-Pt(2)-Rh(2)-C(5) -1(2)

P(3)-Pt(2)-Rh(2)-C(5) 179(2)

Rh(1)-Pt(2)-Rh(2)-C(5) 4(2)

Pt(1)-Pt(2)-Rh(2)-C(5) 72(2)

P(2)-Pt(2)-Rh(2)-C(3) -118.94(19)

P(3)-Pt(2)-Rh(2)-C(3) 60.72(17)

Rh(1)-Pt(2)-Rh(2)-C(3) -113.68(16)

Pt(1)-Pt(2)-Rh(2)-C(3) -45.76(16)

P(2)-Pt(2)-Rh(2)-C(4) 43.52(18)

P(3)-Pt(2)-Rh(2)-C(4) -136.82(15)

Rh(1)-Pt(2)-Rh(2)-C(4) 48.78(15)

Pt(1)-Pt(2)-Rh(2)-C(4) 116.70(15)

P(2)-Pt(2)-Rh(2)-P(4) 145.13(11)

P(3)-Pt(2)-Rh(2)-P(4) -35.21(5)

Rh(1)-Pt(2)-Rh(2)-P(4) 150.38(4)

Pt(1)-Pt(2)-Rh(2)-P(4) -141.69(4)

P(2)-Pt(2)-Rh(2)-Pt(1) -73.18(11)

P(3)-Pt(2)-Rh(2)-Pt(1) 106.48(3)

Rh(1)-Pt(2)-Rh(2)-Pt(1) -67.926(12)

P(2)-Pt(2)-Rh(2)-Rh(1) -5.25(11)

P(3)-Pt(2)-Rh(2)-Rh(1) 174.41(4)

Pt(1)-Pt(2)-Rh(2)-Rh(1) 67.926(12)

C(1)-Pt(1)-Rh(2)-C(5) 58.4(5)

C(2)-Pt(1)-Rh(2)-C(5) -105.0(3)

C(3)-Pt(1)-Rh(2)-C(5) 74.9(3)

Rh(1)-Pt(1)-Rh(2)-C(5) -106.8(2)

Pt(2)-Pt(1)-Rh(2)-C(5) -174.3(2)

C(1)-Pt(1)-Rh(2)-C(3) -16.5(5)

C(2)-Pt(1)-Rh(2)-C(3) -179.9(3)

Rh(1)-Pt(1)-Rh(2)-C(3) 178.3(2)

Pt(2)-Pt(1)-Rh(2)-C(3) 110.8(2)

C(1)-Pt(1)-Rh(2)-C(4) 163.8(4)

C(2)-Pt(1)-Rh(2)-C(4) 0.3(2)

C(3)-Pt(1)-Rh(2)-C(4) -179.8(3)

Rh(1)-Pt(1)-Rh(2)-C(4) -1.52(16)

Pt(2)-Pt(1)-Rh(2)-C(4) -69.03(16)

C(1)-Pt(1)-Rh(2)-P(4) -69.6(4)

C(2)-Pt(1)-Rh(2)-P(4) 127.01(18)

C(3)-Pt(1)-Rh(2)-P(4) -53.1(2)

Rh(1)-Pt(1)-Rh(2)-P(4) 125.16(5)

Pt(2)-Pt(1)-Rh(2)-P(4) 57.66(5)

C(1)-Pt(1)-Rh(2)-Pt(2) -127.2(4)

C(2)-Pt(1)-Rh(2)-Pt(2) 69.35(18)

C(3)-Pt(1)-Rh(2)-Pt(2) -110.8(2)

Rh(1)-Pt(1)-Rh(2)-Pt(2) 67.503(12)

C(1)-Pt(1)-Rh(2)-Rh(1) 165.3(4)

C(2)-Pt(1)-Rh(2)-Rh(1) 1.85(18)

C(3)-Pt(1)-Rh(2)-Rh(1) -178.3(2)

Pt(2)-Pt(1)-Rh(2)-Rh(1) -67.503(12)

C(6)-Rh(1)-Rh(2)-C(5) 0.0(3)

C(2)-Rh(1)-Rh(2)-C(5) 100.3(3)

C(4)-Rh(1)-Rh(2)-C(5) -76.0(3)

P(1)-Rh(1)-Rh(2)-C(5) -137.0(2)

Pt(2)-Rh(1)-Rh(2)-C(5) -179.5(2)

Pt(1)-Rh(1)-Rh(2)-C(5) 102.1(2)

C(6)-Rh(1)-Rh(2)-C(3) -103.5(2)

C(2)-Rh(1)-Rh(2)-C(3) -3.3(2)

C(4)-Rh(1)-Rh(2)-C(3) -179.5(3)

P(1)-Rh(1)-Rh(2)-C(3) 119.47(18)

Pt(2)-Rh(1)-Rh(2)-C(3) 76.91(17)

Pt(1)-Rh(1)-Rh(2)-C(3) -1.42(17)

C(6)-Rh(1)-Rh(2)-C(4) 76.0(3)

C(2)-Rh(1)-Rh(2)-C(4) 176.3(3)

P(1)-Rh(1)-Rh(2)-C(4) -61.0(2)

Pt(2)-Rh(1)-Rh(2)-C(4) -103.6(2)

Pt(1)-Rh(1)-Rh(2)-C(4) 178.1(2)

C(6)-Rh(1)-Rh(2)-P(4) 135.50(18)

C(2)-Rh(1)-Rh(2)-P(4) -124.24(18)

C(4)-Rh(1)-Rh(2)-P(4) 59.5(2)

P(1)-Rh(1)-Rh(2)-P(4) -1.51(8)

Pt(2)-Rh(1)-Rh(2)-P(4) -44.07(5)

Pt(1)-Rh(1)-Rh(2)-P(4) -122.41(5)

C(6)-Rh(1)-Rh(2)-Pt(2) 179.58(17)

C(2)-Rh(1)-Rh(2)-Pt(2) -80.16(17)

C(4)-Rh(1)-Rh(2)-Pt(2) 103.6(2)

P(1)-Rh(1)-Rh(2)-Pt(2) 42.56(6)

Pt(1)-Rh(1)-Rh(2)-Pt(2) -78.332(11)

C(6)-Rh(1)-Rh(2)-Pt(1) -102.09(17)

C(2)-Rh(1)-Rh(2)-Pt(1) -1.83(17)

C(4)-Rh(1)-Rh(2)-Pt(1) -178.1(2)

P(1)-Rh(1)-Rh(2)-Pt(1) 120.90(6)

Pt(2)-Rh(1)-Rh(2)-Pt(1) 78.332(11)

C(6)-Rh(1)-P(1)-C(8) -92.8(3)

C(2)-Rh(1)-P(1)-C(8) 172.7(3)

C(4)-Rh(1)-P(1)-C(8) 2.9(2)

Pt(2)-Rh(1)-P(1)-C(8) 81.2(2)

Pt(1)-Rh(1)-P(1)-C(8) 134.5(2)

Rh(2)-Rh(1)-P(1)-C(8) 45.9(2)

C(6)-Rh(1)-P(1)-C(7) 142.7(2)

C(2)-Rh(1)-P(1)-C(7) 48.3(2)

C(4)-Rh(1)-P(1)-C(7) -121.5(2)

Pt(2)-Rh(1)-P(1)-C(7) -43.30(18)

Pt(1)-Rh(1)-P(1)-C(7) 10.1(2)

Rh(2)-Rh(1)-P(1)-C(7) -78.55(19)

C(6)-Rh(1)-P(1)-C(14) 27.1(3)

C(2)-Rh(1)-P(1)-C(14) -67.3(3)

C(4)-Rh(1)-P(1)-C(14) 122.8(3)

Pt(2)-Rh(1)-P(1)-C(14) -158.9(2)

Pt(1)-Rh(1)-P(1)-C(14) -105.6(2)

Rh(2)-Rh(1)-P(1)-C(14) 165.8(2)

P(3)-Pt(2)-P(2)-C(20) 61.2(2)

Rh(2)-Pt(2)-P(2)-C(20) -119.2(2)

Rh(1)-Pt(2)-P(2)-C(20) -123.9(2)

Pt(1)-Pt(2)-P(2)-C(20) 177.8(2)

P(3)-Pt(2)-P(2)-C(26) -64.4(2)

Rh(2)-Pt(2)-P(2)-C(26) 115.2(2)

Rh(1)-Pt(2)-P(2)-C(26) 110.6(2)

Pt(1)-Pt(2)-P(2)-C(26) 52.2(2)

P(3)-Pt(2)-P(2)-C(7) 178.36(19)

Rh(2)-Pt(2)-P(2)-C(7) -2.0(2)

Rh(1)-Pt(2)-P(2)-C(7) -6.67(19)

Pt(1)-Pt(2)-P(2)-C(7) -65.04(19)

P(2)-Pt(2)-P(3)-C(40) 80.9(2)

Rh(2)-Pt(2)-P(3)-C(40) -98.98(19)

Rh(1)-Pt(2)-P(3)-C(40) -86.7(2)

Pt(1)-Pt(2)-P(3)-C(40) -40.83(19)

P(2)-Pt(2)-P(3)-C(33) -38.3(2)

Rh(2)-Pt(2)-P(3)-C(33) 141.9(2)

Rh(1)-Pt(2)-P(3)-C(33) 154.2(2)

Pt(1)-Pt(2)-P(3)-C(33) -160.0(2)

P(2)-Pt(2)-P(3)-C(32) -163.15(19)

Rh(2)-Pt(2)-P(3)-C(32) 16.97(19)

Rh(1)-Pt(2)-P(3)-C(32) 29.3(2)

Pt(1)-Pt(2)-P(3)-C(32) 75.11(19)

C(5)-Rh(2)-P(4)-C(52) -10.6(3)

C(3)-Rh(2)-P(4)-C(52) 83.6(3)

C(4)-Rh(2)-P(4)-C(52) -108.6(2)

Pt(2)-Rh(2)-P(4)-C(52) 172.49(19)

Pt(1)-Rh(2)-P(4)-C(52) 121.64(19)

Rh(1)-Rh(2)-P(4)-C(52) -150.48(19)

C(5)-Rh(2)-P(4)-C(46) 113.1(3)

C(3)-Rh(2)-P(4)-C(46) -152.7(3)

C(4)-Rh(2)-P(4)-C(46) 15.1(2)

Pt(2)-Rh(2)-P(4)-C(46) -63.8(2)

Pt(1)-Rh(2)-P(4)-C(46) -114.7(2)

Rh(1)-Rh(2)-P(4)-C(46) -26.8(2)

C(5)-Rh(2)-P(4)-C(32) -129.4(3)

C(3)-Rh(2)-P(4)-C(32) -35.2(2)

C(4)-Rh(2)-P(4)-C(32) 132.6(2)

Pt(2)-Rh(2)-P(4)-C(32) 53.68(18)

Pt(1)-Rh(2)-P(4)-C(32) 2.84(19)

Rh(1)-Rh(2)-P(4)-C(32) 90.71(18)

C(2)-Pt(1)-C(1)-O(1) 102(23)

C(3)-Pt(1)-C(1)-O(1) -75(24)

Rh(2)-Pt(1)-C(1)-O(1) -62(24)

Rh(1)-Pt(1)-C(1)-O(1) 92(23)

Pt(2)-Pt(1)-C(1)-O(1) -163(23)

C(1)-Pt(1)-C(2)-O(2) 2.1(8)

C(3)-Pt(1)-C(2)-O(2) 173.1(6)

Rh(2)-Pt(1)-C(2)-O(2) 173.3(7)

Rh(1)-Pt(1)-C(2)-O(2) 175.4(9)

Pt(2)-Pt(1)-C(2)-O(2) -135.8(8)

C(1)-Pt(1)-C(2)-Rh(1) -173.3(2)

C(3)-Pt(1)-C(2)-Rh(1) -2.3(7)

Rh(2)-Pt(1)-C(2)-Rh(1) -2.1(2)

Pt(2)-Pt(1)-C(2)-Rh(1) 48.78(13)

C(6)-Rh(1)-C(2)-O(2) -61.8(8)

C(4)-Rh(1)-C(2)-O(2) -165.9(6)

P(1)-Rh(1)-C(2)-O(2) 41.7(8)

Pt(2)-Rh(1)-C(2)-O(2) 129.4(8)

Pt(1)-Rh(1)-C(2)-O(2) -175.5(9)

Rh(2)-Rh(1)-C(2)-O(2) -173.4(7)

C(6)-Rh(1)-C(2)-Pt(1) 113.8(2)

C(4)-Rh(1)-C(2)-Pt(1) 9.7(7)

P(1)-Rh(1)-C(2)-Pt(1) -142.80(13)

Pt(2)-Rh(1)-C(2)-Pt(1) -55.10(15)

Rh(2)-Rh(1)-C(2)-Pt(1) 2.1(2)

C(5)-Rh(2)-C(3)-O(3) 63.5(8)

C(4)-Rh(2)-C(3)-O(3) -179.6(6)

P(4)-Rh(2)-C(3)-O(3) -36.2(8)

Pt(2)-Rh(2)-C(3)-O(3) -121.4(8)

Pt(1)-Rh(2)-C(3)-O(3) 179.8(9)

Rh(1)-Rh(2)-C(3)-O(3) -178.6(7)

C(5)-Rh(2)-C(3)-Pt(1) -116.3(2)

C(4)-Rh(2)-C(3)-Pt(1) 0.6(7)

P(4)-Rh(2)-C(3)-Pt(1) 144.00(13)

Pt(2)-Rh(2)-C(3)-Pt(1) 58.81(14)

Rh(1)-Rh(2)-C(3)-Pt(1) 1.6(2)

C(1)-Pt(1)-C(3)-O(3) -8.5(8)

C(2)-Pt(1)-C(3)-O(3) -179.5(6)

Rh(2)-Pt(1)-C(3)-O(3) -179.8(8)

Rh(1)-Pt(1)-C(3)-O(3) 178.6(7)

Pt(2)-Pt(1)-C(3)-O(3) 128.8(7)

C(1)-Pt(1)-C(3)-Rh(2) 171.3(2)

C(2)-Pt(1)-C(3)-Rh(2) 0.3(7)

Rh(1)-Pt(1)-C(3)-Rh(2) -1.6(2)

Pt(2)-Pt(1)-C(3)-Rh(2) -51.45(13)

C(5)-Rh(2)-C(4)-O(4) -54.7(7)

C(3)-Rh(2)-C(4)-O(4) -171.1(6)

P(4)-Rh(2)-C(4)-O(4) 46.0(7)

Pt(2)-Rh(2)-C(4)-O(4) 129.2(7)

Pt(1)-Rh(2)-C(4)-O(4) -170.6(6)

Rh(1)-Rh(2)-C(4)-O(4) -172.4(8)

C(5)-Rh(2)-C(4)-Rh(1) 117.7(2)

C(3)-Rh(2)-C(4)-Rh(1) 1.2(7)

P(4)-Rh(2)-C(4)-Rh(1) -141.65(11)

Pt(2)-Rh(2)-C(4)-Rh(1) -58.40(12)

Pt(1)-Rh(2)-C(4)-Rh(1) 1.73(18)

C(6)-Rh(1)-C(4)-O(4) 58.5(7)

C(2)-Rh(1)-C(4)-O(4) 162.7(6)

P(1)-Rh(1)-C(4)-O(4) -45.5(7)

Pt(2)-Rh(1)-C(4)-O(4) -130.3(7)

Pt(1)-Rh(1)-C(4)-O(4) 170.4(7)

Rh(2)-Rh(1)-C(4)-O(4) 172.1(8)

C(6)-Rh(1)-C(4)-Rh(2) -113.6(2)

C(2)-Rh(1)-C(4)-Rh(2) -9.5(7)

P(1)-Rh(1)-C(4)-Rh(2) 142.39(11)

Pt(2)-Rh(1)-C(4)-Rh(2) 57.55(11)

Pt(1)-Rh(1)-C(4)-Rh(2) -1.72(18)

C(3)-Rh(2)-C(5)-O(5) -52(19)

C(4)-Rh(2)-C(5)-O(5) 147(19)

P(4)-Rh(2)-C(5)-O(5) 45(19)

Pt(2)-Rh(2)-C(5)-O(5) -170(17)

Pt(1)-Rh(2)-C(5)-O(5) -100(19)

Rh(1)-Rh(2)-C(5)-O(5) -165(19)

C(2)-Rh(1)-C(6)-O(6) -80(17)

C(4)-Rh(1)-C(6)-O(6) 79(17)

P(1)-Rh(1)-C(6)-O(6) -177(100)

Pt(2)-Rh(1)-C(6)-O(6) 33(17)

Pt(1)-Rh(1)-C(6)-O(6) -32(17)

Rh(2)-Rh(1)-C(6)-O(6) 32(17)

C(8)-P(1)-C(7)-P(2) -82.4(3)

C(14)-P(1)-C(7)-P(2) 174.9(3)

Rh(1)-P(1)-C(7)-P(2) 47.8(3)

C(20)-P(2)-C(7)-P(1) 104.2(3)

C(26)-P(2)-C(7)-P(1) -146.5(3)

Pt(2)-P(2)-C(7)-P(1) -22.5(3)

C(7)-P(1)-C(8)-C(9) 0.4(5)

C(14)-P(1)-C(8)-C(9) 103.6(5)

Rh(1)-P(1)-C(8)-C(9) -126.3(4)

C(7)-P(1)-C(8)-C(13) -176.6(4)

C(14)-P(1)-C(8)-C(13) -73.4(4)

Rh(1)-P(1)-C(8)-C(13) 56.7(4)

C(13)-C(8)-C(9)-C(10) -2.2(8)

P(1)-C(8)-C(9)-C(10) -179.1(4)

C(8)-C(9)-C(10)-C(11) 1.3(8)

C(9)-C(10)-C(11)-C(12) 0.5(9)

C(10)-C(11)-C(12)-C(13) -1.3(9)

C(9)-C(8)-C(13)-C(12) 1.5(8)

P(1)-C(8)-C(13)-C(12) 178.6(4)

C(11)-C(12)-C(13)-C(8) 0.3(9)

C(8)-P(1)-C(14)-C(15) -42.0(6)

C(7)-P(1)-C(14)-C(15) 67.3(6)

Rh(1)-P(1)-C(14)-C(15) -171.0(4)

C(8)-P(1)-C(14)-C(19) 139.1(5)

C(7)-P(1)-C(14)-C(19) -111.7(5)

Rh(1)-P(1)-C(14)-C(19) 10.0(6)

C(19)-C(14)-C(15)-C(16) -1.1(10)

P(1)-C(14)-C(15)-C(16) 179.9(5)

C(14)-C(15)-C(16)-C(17) 1.2(11)

C(15)-C(16)-C(17)-C(18) -1.1(11)

C(16)-C(17)-C(18)-C(19) 0.9(11)

C(15)-C(14)-C(19)-C(18) 0.9(9)

P(1)-C(14)-C(19)-C(18) 179.8(5)

C(17)-C(18)-C(19)-C(14) -0.8(10)

C(26)-P(2)-C(20)-C(21) 135.9(4)

C(7)-P(2)-C(20)-C(21) -116.3(4)

Pt(2)-P(2)-C(20)-C(21) 5.8(5)

C(26)-P(2)-C(20)-C(25) -51.8(5)

C(7)-P(2)-C(20)-C(25) 56.0(5)

Pt(2)-P(2)-C(20)-C(25) 178.1(4)

C(25)-C(20)-C(21)-C(22) -1.0(8)

P(2)-C(20)-C(21)-C(22) 171.7(4)

C(20)-C(21)-C(22)-C(23) 0.6(8)

C(21)-C(22)-C(23)-C(24) 0.4(9)

C(22)-C(23)-C(24)-C(25) -1.0(10)

C(23)-C(24)-C(25)-C(20) 0.6(10)

C(21)-C(20)-C(25)-C(24) 0.4(9)

P(2)-C(20)-C(25)-C(24) -171.9(5)

C(20)-P(2)-C(26)-C(27) 166.9(4)

C(7)-P(2)-C(26)-C(27) 60.3(5)

Pt(2)-P(2)-C(26)-C(27) -61.2(5)

C(20)-P(2)-C(26)-C(31) -22.2(6)

C(7)-P(2)-C(26)-C(31) -128.8(5)

Pt(2)-P(2)-C(26)-C(31) 109.7(5)

C(31)-C(26)-C(27)-C(28) 0.6(9)

P(2)-C(26)-C(27)-C(28) 172.0(5)

C(26)-C(27)-C(28)-C(29) -1.2(10)

C(27)-C(28)-C(29)-C(30) 0.5(11)

C(28)-C(29)-C(30)-C(31) 0.8(12)

C(29)-C(30)-C(31)-C(26) -1.5(11)

C(27)-C(26)-C(31)-C(30) 0.8(9)

P(2)-C(26)-C(31)-C(30) -170.3(5)

C(52)-P(4)-C(32)-P(3) -176.0(3)

C(46)-P(4)-C(32)-P(3) 79.8(3)

Rh(2)-P(4)-C(32)-P(3) -51.0(3)

C(40)-P(3)-C(32)-P(4) 139.4(3)

C(33)-P(3)-C(32)-P(4) -116.0(3)

Pt(2)-P(3)-C(32)-P(4) 16.3(3)

C(40)-P(3)-C(33)-C(38) -43.1(5)

C(32)-P(3)-C(33)-C(38) -148.9(4)

Pt(2)-P(3)-C(33)-C(38) 83.0(4)

C(40)-P(3)-C(33)-C(34) 144.9(4)

C(32)-P(3)-C(33)-C(34) 39.1(5)

Pt(2)-P(3)-C(33)-C(34) -89.0(4)

C(38)-C(33)-C(34)-C(35) -2.7(8)

P(3)-C(33)-C(34)-C(35) 169.3(4)

C(33)-C(34)-C(35)-C(36) 0.6(9)

C(34)-C(35)-C(36)-C(37) 1.6(9)

C(35)-C(36)-C(37)-C(38) -1.6(9)

C(36)-C(37)-C(38)-C(33) -0.6(9)

C(34)-C(33)-C(38)-C(37) 2.7(8)

P(3)-C(33)-C(38)-C(37) -169.7(5)

C(33)-P(3)-C(40)-C(45) 115.7(5)

C(32)-P(3)-C(40)-C(45) -135.6(5)

Pt(2)-P(3)-C(40)-C(45) -13.8(5)

C(33)-P(3)-C(40)-C(41) -62.6(5)

C(32)-P(3)-C(40)-C(41) 46.1(5)

Pt(2)-P(3)-C(40)-C(41) 167.9(4)

C(45)-C(40)-C(41)-C(42) -0.8(9)

P(3)-C(40)-C(41)-C(42) 177.6(5)

C(40)-C(41)-C(42)-C(43) -1.6(10)

C(41)-C(42)-C(43)-C(44) 1.7(10)

C(42)-C(43)-C(44)-C(45) 0.6(10)

C(43)-C(44)-C(45)-C(40) -2.9(9)

C(41)-C(40)-C(45)-C(44) 3.0(9)

P(3)-C(40)-C(45)-C(44) -175.4(5)

C(52)-P(4)-C(46)-C(47) 151.1(4)

C(32)-P(4)-C(46)-C(47) -101.6(5)

Rh(2)-P(4)-C(46)-C(47) 21.1(5)

C(52)-P(4)-C(46)-C(51) -35.4(5)

C(32)-P(4)-C(46)-C(51) 72.0(4)

Rh(2)-P(4)-C(46)-C(51) -165.4(3)

C(51)-C(46)-C(47)-C(48) -0.3(8)

P(4)-C(46)-C(47)-C(48) 173.3(4)

C(46)-C(47)-C(48)-C(49) -0.4(8)

C(47)-C(48)-C(49)-C(50) 0.9(9)

C(48)-C(49)-C(50)-C(51) -0.7(9)

C(49)-C(50)-C(51)-C(46) -0.1(9)

C(47)-C(46)-C(51)-C(50) 0.5(8)

P(4)-C(46)-C(51)-C(50) -173.3(4)

C(46)-P(4)-C(52)-C(57) 121.2(5)

C(32)-P(4)-C(52)-C(57) 17.8(5)

Rh(2)-P(4)-C(52)-C(57) -104.2(5)

C(46)-P(4)-C(52)-C(53) -60.1(5)

C(32)-P(4)-C(52)-C(53) -163.6(4)

Rh(2)-P(4)-C(52)-C(53) 74.4(5)

C(57)-C(52)-C(53)-C(54) -3.9(9)

P(4)-C(52)-C(53)-C(54) 177.3(5)

C(52)-C(53)-C(54)-C(55) 0.9(9)

C(53)-C(54)-C(55)-C(56) 2.4(10)

C(54)-C(55)-C(56)-C(57) -2.6(10)

C(53)-C(52)-C(57)-C(56) 3.7(9)

P(4)-C(52)-C(57)-C(56) -177.7(5)

C(55)-C(56)-C(57)-C(52) -0.5(10)

___________________________________________________________________________________________

Symmetry transformations used to generate equivalent atoms:

**Table S7.** Crystal data and structure refinement for structure 1b.

| Identification code | structure 1b |  |
| --- | --- | --- |
| Empirical formula | C56.50H46O6.50P4Pt2Rh2 |  |
| Formula weight | 1548.81 |  |
| Temperature | 120(2) K |  |
| Wavelength | 0.71073 Å |  |
| Crystal system | Monoclinic |  |
| Space group | P 21/n |  |
| Unit cell dimensions | a = 13.7311(2) Å | = 90°. |
|  | b = 29.1268(3) Å | = 100.8680(10)°. |
|  | c = 13.8315(3) Å |  = 90°. |
| Volume | 5432.59(15) Å3 |  |
| Z | 4 |  |
| Density (calculated) | 1.894 Mg/m3 |  |
| Absorption coefficient | 5.898 mm-1 |  |
| F(000) | 2972 |  |
| Crystal size | 0.30 x 0.20 x 0.20 mm3 |  |
| Theta range for data collection | 2.32 to 25.05°. |  |
| Index ranges | -16<=h<=16, -33<=k<=32, -16<=l<=16 |  |
| Reflections collected | 31093 |  |
| Independent reflections | 8513 [R(int) = 0.0422] |  |
| Completeness to theta = 25.05° | 88.4 % |  |
| Absorption correction | Semi-empirical from equivalents |  |
| Max. and min. transmission | 0.3850 and 0.2706 |  |
| Refinement method | Full-matrix least-squares on F2 |  |
| Data / restraints / parameters | 8513 / 0 / 644 |  |
| Goodness-of-fit on F2 | 1.081 |  |
| Final R indices [I>2sigma(I)] | R1 = 0.0288, wR2 = 0.0643 |  |
| R indices (all data) | R1 = 0.0373, wR2 = 0.0671 |  |
| Largest diff. peak and hole | 1.213 and -1.581 e.Å-3 |  |

**Table S8.** Atomic coordinates ( x 104) and equivalent isotropic displacement parameters (Å2x 103)

for structure 1b. U(eq) is defined as one third of the trace of the orthogonalized Uij tensor.

________________________________________________________________________________

x y z U(eq)

________________________________________________________________________________

Pt(1) 8346(1) 4115(1) 4952(1) 21(1)

Pt(2) 7105(1) 3292(1) 4195(1) 15(1)

Rh(1) 8427(1) 3659(1) 3285(1) 15(1)

Rh(2) 6781(1) 4125(1) 3445(1) 20(1)

P(1) 9058(1) 4243(1) 2410(1) 22(1)

P(2) 7208(1) 4794(1) 2713(1) 27(1)

P(3) 8972(1) 2954(1) 2872(1) 14(1)

P(4) 7978(1) 2626(1) 4586(1) 14(1)

O(1) 9529(4) 4364(2) 6943(4) 42(1)

O(2) 10200(3) 3530(1) 4954(3) 25(1)

O(3) 6437(3) 4545(2) 5382(4) 45(1)

O(4) 5247(3) 3167(2) 5028(4) 46(1)

O(5) 6619(3) 3493(1) 1640(3) 25(1)

O(6) 4547(3) 4128(2) 2747(4) 49(1)

C(1) 9057(4) 4282(2) 6194(5) 26(1)

C(2) 9451(4) 3677(2) 4537(4) 18(1)

C(3) 6919(4) 4377(2) 4872(5) 32(2)

C(4) 5955(4) 3214(2) 4700(4) 25(1)

C(5) 7088(4) 3644(2) 2364(5) 20(1)

C(6) 5392(5) 4134(2) 3028(5) 30(2)

C(7) 8553(4) 4803(2) 2729(5) 27(1)

C(8) 10381(4) 4382(2) 2684(5) 24(1)

C(9) 10815(4) 4512(2) 3631(5) 31(2)

C(10) 11818(5) 4615(2) 3891(6) 36(2)

C(11) 12407(5) 4574(2) 3182(6) 36(2)

C(12) 11992(4) 4439(2) 2245(6) 36(2)

C(13) 10992(4) 4345(2) 1991(5) 28(1)

C(14) 7008(4) 5322(2) 3355(6) 35(2)

C(15) 7702(5) 5678(2) 3528(5) 37(2)

C(16) 7490(5) 6082(2) 3989(6) 50(2)

C(17) 6598(6) 6132(2) 4298(9) 88(4)

C(18) 5903(6) 5775(3) 4137(11) 111(5)

C(19) 6112(5) 5380(2) 3660(8) 73(3)

C(20) 6709(4) 4929(2) 1428(6) 38(2)

C(21) 6775(5) 5373(2) 1054(6) 53(2)

C(22) 6495(6) 5469(3) 84(8) 66(3)

C(23) 6147(5) 5131(3) -569(7) 58(2)

C(24) 6061(5) 4687(3) -231(6) 47(2)

C(25) 6332(5) 4590(2) 764(5) 39(2)

C(26) 8784(4) 4226(2) 1069(5) 29(1)

C(27) 8887(5) 4606(2) 473(5) 39(2)

C(28) 8686(5) 4570(3) -538(6) 48(2)

C(29) 8376(5) 4160(3) -983(6) 47(2)

C(30) 8273(5) 3778(2) -406(5) 39(2)

C(31) 8467(4) 3813(2) 596(5) 30(1)

C(32) 8988(4) 2545(2) 3898(4) 16(1)

C(33) 7249(4) 2098(2) 4453(4) 16(1)

C(34) 7274(4) 1774(2) 3719(4) 24(1)

C(35) 6630(4) 1399(2) 3646(5) 30(1)

C(36) 5991(4) 1340(2) 4292(5) 30(1)

C(37) 5977(4) 1658(2) 5020(4) 26(1)

C(38) 6587(4) 2038(2) 5096(4) 21(1)

C(39) 8652(4) 2606(2) 5855(4) 15(1)

C(40) 9174(4) 2208(2) 6219(4) 21(1)

C(41) 9760(4) 2208(2) 7154(4) 28(1)

C(42) 9833(4) 2603(2) 7729(4) 26(1)

C(43) 9326(4) 2995(2) 7377(4) 27(1)

C(44) 8732(4) 2996(2) 6442(4) 21(1)

C(45) 10244(4) 2867(2) 2707(4) 16(1)

C(46) 10598(4) 2426(2) 2551(4) 20(1)

C(47) 11589(4) 2361(2) 2512(4) 24(1)

C(48) 12239(4) 2732(2) 2618(4) 24(1)

C(49) 11895(4) 3169(2) 2759(4) 24(1)

C(50) 10901(4) 3235(2) 2810(4) 17(1)

C(51) 8240(4) 2664(2) 1815(4) 16(1)

C(52) 8593(4) 2598(2) 944(4) 21(1)

C(53) 7992(4) 2401(2) 128(4) 24(1)

C(54) 7043(4) 2260(2) 186(4) 24(1)

C(55) 6682(4) 2319(2) 1040(4) 22(1)

C(56) 7265(3) 2524(2) 1843(4) 19(1)

O(60) 9703(3) 1478(2) 3603(4) 131(8)

C(60) 10491(3) 1505(2) 4401(4) 100(8)

________________________________________________________________________________

**Table S9.** Bond lengths [Å] and angles [°] for structure 1b.

_______________________________________________________________________________________________

Pt(1)-C(1) 1.874(7)

Pt(1)-C(3) 2.085(6)

Pt(1)-C(2) 2.143(5)

Pt(1)-Rh(1) 2.6804(5)

Pt(1)-Rh(2) 2.6965(5)

Pt(1)-Pt(2) 3.0115(3)

Pt(2)-C(4) 1.857(6)

Pt(2)-P(4) 2.2906(13)

Pt(2)-Rh(1) 2.6237(4)

Pt(2)-Rh(2) 2.6441(4)

Rh(1)-C(2) 2.015(6)

Rh(1)-C(5) 2.030(6)

Rh(1)-P(3) 2.2948(13)

Rh(1)-P(1) 2.3471(14)

Rh(1)-Rh(2) 2.6808(6)

Rh(2)-C(6) 1.886(7)

Rh(2)-C(3) 2.081(7)

Rh(2)-C(5) 2.148(6)

Rh(2)-P(2) 2.3209(14)

P(1)-C(26) 1.822(7)

P(1)-C(8) 1.829(6)

P(1)-C(7) 1.857(5)

P(2)-C(14) 1.823(6)

P(2)-C(20) 1.823(7)

P(2)-C(7) 1.843(5)

P(3)-C(51) 1.818(5)

P(3)-C(45) 1.821(5)

P(3)-C(32) 1.849(5)

P(4)-C(39) 1.824(6)

P(4)-C(33) 1.825(5)

P(4)-C(32) 1.839(5)

O(1)-C(1) 1.139(7)

O(2)-C(2) 1.162(6)

O(3)-C(3) 1.162(7)

O(4)-C(4) 1.155(7)

O(5)-C(5) 1.170(6)

O(6)-C(6) 1.152(7)

C(7)-H(7A) 0.9900

C(7)-H(7B) 0.9900

C(8)-C(9) 1.386(9)

C(8)-C(13) 1.391(8)

C(9)-C(10) 1.388(8)

C(9)-H(9) 0.9500

C(10)-C(11) 1.389(9)

C(10)-H(10) 0.9500

C(11)-C(12) 1.371(9)

C(11)-H(11) 0.9500

C(12)-C(13) 1.379(8)

C(12)-H(12) 0.9500

C(13)-H(13) 0.9500

C(14)-C(19) 1.384(9)

C(14)-C(15) 1.397(8)

C(15)-C(16) 1.396(9)

C(15)-H(15) 0.9500

C(16)-C(17) 1.379(10)

C(16)-H(16) 0.9500

C(17)-C(18) 1.401(10)

C(17)-H(17) 0.9500

C(18)-C(19) 1.384(11)

C(18)-H(18) 0.9500

C(19)-H(19) 0.9500

C(20)-C(25) 1.382(10)

C(20)-C(21) 1.403(9)

C(21)-C(22) 1.352(12)

C(21)-H(21) 0.9500

C(22)-C(23) 1.359(12)

C(22)-H(22) 0.9500

C(23)-C(24) 1.389(10)

C(23)-H(23) 0.9500

C(24)-C(25) 1.386(10)

C(24)-H(24) 0.9500

C(25)-H(25) 0.9500

C(26)-C(31) 1.397(9)

C(26)-C(27) 1.403(8)

C(27)-C(28) 1.377(10)

C(27)-H(27) 0.9500

C(28)-C(29) 1.373(11)

C(28)-H(28) 0.9500

C(29)-C(30) 1.392(10)

C(29)-H(29) 0.9500

C(30)-C(31) 1.365(9)

C(30)-H(30) 0.9500

C(31)-H(31) 0.9500

C(32)-H(32A) 0.9900

C(32)-H(32B) 0.9900

C(33)-C(34) 1.392(8)

C(33)-C(38) 1.398(7)

C(34)-C(35) 1.396(8)

C(34)-H(34) 0.9500

C(35)-C(36) 1.375(9)

C(35)-H(35) 0.9500

C(36)-C(37) 1.371(8)

C(36)-H(36) 0.9500

C(37)-C(38) 1.382(7)

C(37)-H(37) 0.9500

C(38)-H(38) 0.9500

C(39)-C(44) 1.389(7)

C(39)-C(40) 1.405(7)

C(40)-C(41) 1.388(8)

C(40)-H(40) 0.9500

C(41)-C(42) 1.390(8)

C(41)-H(41) 0.9500

C(42)-C(43) 1.377(8)

C(42)-H(42) 0.9500

C(43)-C(44) 1.393(8)

C(43)-H(43) 0.9500

C(44)-H(44) 0.9500

C(45)-C(50) 1.391(7)

C(45)-C(46) 1.404(7)

C(46)-C(47) 1.384(7)

C(46)-H(46) 0.9500

C(47)-C(48) 1.392(8)

C(47)-H(47) 0.9500

C(48)-C(49) 1.384(8)

C(48)-H(48) 0.9500

C(49)-C(50) 1.394(7)

C(49)-H(49) 0.9500

C(50)-H(50) 0.9500

C(51)-C(52) 1.394(7)

C(51)-C(56) 1.407(7)

C(52)-C(53) 1.390(8)

C(52)-H(52) 0.9500

C(53)-C(54) 1.383(8)

C(53)-H(53) 0.9500

C(54)-C(55) 1.375(8)

C(54)-H(54) 0.9500

C(55)-C(56) 1.377(7)

C(55)-H(55) 0.9500

C(56)-H(56) 0.9500

O(60)-C(60) 1.3946

O(60)-H(601) 1.0966

C(60)-H(60A) 0.9800

C(60)-H(60B) 0.9800

C(60)-H(60C) 0.9800

C(1)-Pt(1)-C(3) 106.0(3)

C(1)-Pt(1)-C(2) 97.3(2)

C(3)-Pt(1)-C(2) 155.5(2)

C(1)-Pt(1)-Rh(1) 144.91(17)

C(3)-Pt(1)-Rh(1) 109.08(18)

C(2)-Pt(1)-Rh(1) 47.80(15)

C(1)-Pt(1)-Rh(2) 155.16(17)

C(3)-Pt(1)-Rh(2) 49.59(18)

C(2)-Pt(1)-Rh(2) 107.53(15)

Rh(1)-Pt(1)-Rh(2) 59.811(13)

C(1)-Pt(1)-Pt(2) 133.50(17)

C(3)-Pt(1)-Pt(2) 78.99(15)

C(2)-Pt(1)-Pt(2) 79.39(13)

Rh(1)-Pt(1)-Pt(2) 54.521(10)

Rh(2)-Pt(1)-Pt(2) 54.854(10)

C(4)-Pt(2)-P(4) 104.57(16)

C(4)-Pt(2)-Rh(1) 160.84(16)

P(4)-Pt(2)-Rh(1) 94.57(3)

C(4)-Pt(2)-Rh(2) 99.69(16)

P(4)-Pt(2)-Rh(2) 155.73(3)

Rh(1)-Pt(2)-Rh(2) 61.181(13)

C(4)-Pt(2)-Pt(1) 115.62(17)

P(4)-Pt(2)-Pt(1) 110.81(3)

Rh(1)-Pt(2)-Pt(1) 56.298(10)

Rh(2)-Pt(2)-Pt(1) 56.502(11)

C(2)-Rh(1)-C(5) 160.5(2)

C(2)-Rh(1)-P(3) 91.65(14)

C(5)-Rh(1)-P(3) 97.10(15)

C(2)-Rh(1)-P(1) 99.13(14)

C(5)-Rh(1)-P(1) 94.08(15)

P(3)-Rh(1)-P(1) 110.54(5)

C(2)-Rh(1)-Pt(2) 91.84(15)

C(5)-Rh(1)-Pt(2) 70.46(15)

P(3)-Rh(1)-Pt(2) 92.42(3)

P(1)-Rh(1)-Pt(2) 154.06(4)

C(2)-Rh(1)-Pt(1) 51.98(15)

C(5)-Rh(1)-Pt(1) 111.77(15)

P(3)-Rh(1)-Pt(1) 136.52(4)

P(1)-Rh(1)-Pt(1) 99.43(4)

Pt(2)-Rh(1)-Pt(1) 69.181(12)

C(2)-Rh(1)-Rh(2) 112.28(15)

C(5)-Rh(1)-Rh(2) 52.05(15)

P(3)-Rh(1)-Rh(2) 142.50(4)

P(1)-Rh(1)-Rh(2) 94.28(4)

Pt(2)-Rh(1)-Rh(2) 59.784(13)

Pt(1)-Rh(1)-Rh(2) 60.393(14)

C(6)-Rh(2)-C(3) 101.0(3)

C(6)-Rh(2)-C(5) 96.6(2)

C(3)-Rh(2)-C(5) 153.6(2)

C(6)-Rh(2)-P(2) 100.35(17)

C(3)-Rh(2)-P(2) 97.60(16)

C(5)-Rh(2)-P(2) 98.37(14)

C(6)-Rh(2)-Pt(2) 102.58(16)

C(3)-Rh(2)-Pt(2) 88.44(16)

C(5)-Rh(2)-Pt(2) 68.51(14)

P(2)-Rh(2)-Pt(2) 154.68(4)

C(6)-Rh(2)-Rh(1) 143.24(17)

C(3)-Rh(2)-Rh(1) 109.22(17)

C(5)-Rh(2)-Rh(1) 48.19(15)

P(2)-Rh(2)-Rh(1) 95.91(4)

Pt(2)-Rh(2)-Rh(1) 59.034(12)

C(6)-Rh(2)-Pt(1) 148.1(2)

C(3)-Rh(2)-Pt(1) 49.74(17)

C(5)-Rh(2)-Pt(1) 107.36(15)

P(2)-Rh(2)-Pt(1) 96.68(4)

Pt(2)-Rh(2)-Pt(1) 68.644(12)

Rh(1)-Rh(2)-Pt(1) 59.797(13)

C(26)-P(1)-C(8) 102.9(3)

C(26)-P(1)-C(7) 104.6(3)

C(8)-P(1)-C(7) 99.1(2)

C(26)-P(1)-Rh(1) 118.63(19)

C(8)-P(1)-Rh(1) 120.14(18)

C(7)-P(1)-Rh(1) 108.82(19)

C(14)-P(2)-C(20) 103.3(3)

C(14)-P(2)-C(7) 103.0(3)

C(20)-P(2)-C(7) 101.5(3)

C(14)-P(2)-Rh(2) 115.0(2)

C(20)-P(2)-Rh(2) 121.8(2)

C(7)-P(2)-Rh(2) 109.96(18)

C(51)-P(3)-C(45) 103.4(2)

C(51)-P(3)-C(32) 104.0(2)

C(45)-P(3)-C(32) 97.6(2)

C(51)-P(3)-Rh(1) 117.33(16)

C(45)-P(3)-Rh(1) 121.46(16)

C(32)-P(3)-Rh(1) 110.04(17)

C(39)-P(4)-C(33) 103.8(2)

C(39)-P(4)-C(32) 101.4(2)

C(33)-P(4)-C(32) 107.0(2)

C(39)-P(4)-Pt(2) 113.75(16)

C(33)-P(4)-Pt(2) 115.92(16)

C(32)-P(4)-Pt(2) 113.50(16)

O(1)-C(1)-Pt(1) 175.9(5)

O(2)-C(2)-Rh(1) 145.8(4)

O(2)-C(2)-Pt(1) 133.7(4)

Rh(1)-C(2)-Pt(1) 80.2(2)

O(3)-C(3)-Rh(2) 139.8(5)

O(3)-C(3)-Pt(1) 139.4(6)

Rh(2)-C(3)-Pt(1) 80.7(2)

O(4)-C(4)-Pt(2) 179.0(6)

O(5)-C(5)-Rh(1) 146.3(4)

O(5)-C(5)-Rh(2) 133.9(4)

Rh(1)-C(5)-Rh(2) 79.8(2)

O(6)-C(6)-Rh(2) 177.5(6)

P(2)-C(7)-P(1) 113.8(3)

P(2)-C(7)-H(7A) 108.8

P(1)-C(7)-H(7A) 108.8

P(2)-C(7)-H(7B) 108.8

P(1)-C(7)-H(7B) 108.8

H(7A)-C(7)-H(7B) 107.7

C(9)-C(8)-C(13) 117.6(5)

C(9)-C(8)-P(1) 119.3(4)

C(13)-C(8)-P(1) 123.0(5)

C(8)-C(9)-C(10) 122.2(6)

C(8)-C(9)-H(9) 118.9

C(10)-C(9)-H(9) 118.9

C(9)-C(10)-C(11) 118.6(7)

C(9)-C(10)-H(10) 120.7

C(11)-C(10)-H(10) 120.7

C(12)-C(11)-C(10) 119.9(6)

C(12)-C(11)-H(11) 120.0

C(10)-C(11)-H(11) 120.0

C(11)-C(12)-C(13) 120.9(6)

C(11)-C(12)-H(12) 119.5

C(13)-C(12)-H(12) 119.5

C(12)-C(13)-C(8) 120.7(6)

C(12)-C(13)-H(13) 119.7

C(8)-C(13)-H(13) 119.7

C(19)-C(14)-C(15) 118.4(6)

C(19)-C(14)-P(2) 118.3(5)

C(15)-C(14)-P(2) 123.2(5)

C(16)-C(15)-C(14) 120.6(6)

C(16)-C(15)-H(15) 119.7

C(14)-C(15)-H(15) 119.7

C(17)-C(16)-C(15) 120.4(6)

C(17)-C(16)-H(16) 119.8

C(15)-C(16)-H(16) 119.8

C(16)-C(17)-C(18) 119.3(7)

C(16)-C(17)-H(17) 120.3

C(18)-C(17)-H(17) 120.3

C(19)-C(18)-C(17) 119.9(7)

C(19)-C(18)-H(18) 120.1

C(17)-C(18)-H(18) 120.1

C(18)-C(19)-C(14) 121.4(6)

C(18)-C(19)-H(19) 119.3

C(14)-C(19)-H(19) 119.3

C(25)-C(20)-C(21) 117.1(7)

C(25)-C(20)-P(2) 121.2(5)

C(21)-C(20)-P(2) 121.4(6)

C(22)-C(21)-C(20) 122.0(8)

C(22)-C(21)-H(21) 119.0

C(20)-C(21)-H(21) 119.0

C(21)-C(22)-C(23) 120.6(8)

C(21)-C(22)-H(22) 119.7

C(23)-C(22)-H(22) 119.7

C(22)-C(23)-C(24) 119.4(8)

C(22)-C(23)-H(23) 120.3

C(24)-C(23)-H(23) 120.3

C(25)-C(24)-C(23) 120.0(8)

C(25)-C(24)-H(24) 120.0

C(23)-C(24)-H(24) 120.0

C(20)-C(25)-C(24) 120.8(7)

C(20)-C(25)-H(25) 119.6

C(24)-C(25)-H(25) 119.6

C(31)-C(26)-C(27) 117.4(6)

C(31)-C(26)-P(1) 119.1(4)

C(27)-C(26)-P(1) 123.5(5)

C(28)-C(27)-C(26) 120.8(7)

C(28)-C(27)-H(27) 119.6

C(26)-C(27)-H(27) 119.6

C(29)-C(28)-C(27) 120.5(6)

C(29)-C(28)-H(28) 119.8

C(27)-C(28)-H(28) 119.8

C(28)-C(29)-C(30) 119.6(7)

C(28)-C(29)-H(29) 120.2

C(30)-C(29)-H(29) 120.2

C(31)-C(30)-C(29) 120.0(7)

C(31)-C(30)-H(30) 120.0

C(29)-C(30)-H(30) 120.0

C(30)-C(31)-C(26) 121.6(6)

C(30)-C(31)-H(31) 119.2

C(26)-C(31)-H(31) 119.2

P(4)-C(32)-P(3) 114.4(3)

P(4)-C(32)-H(32A) 108.7

P(3)-C(32)-H(32A) 108.7

P(4)-C(32)-H(32B) 108.7

P(3)-C(32)-H(32B) 108.7

H(32A)-C(32)-H(32B) 107.6

C(34)-C(33)-C(38) 119.2(5)

C(34)-C(33)-P(4) 123.9(4)

C(38)-C(33)-P(4) 116.8(4)

C(33)-C(34)-C(35) 118.8(5)

C(33)-C(34)-H(34) 120.6

C(35)-C(34)-H(34) 120.6

C(36)-C(35)-C(34) 121.5(6)

C(36)-C(35)-H(35) 119.3

C(34)-C(35)-H(35) 119.3

C(37)-C(36)-C(35) 119.6(5)

C(37)-C(36)-H(36) 120.2

C(35)-C(36)-H(36) 120.2

C(36)-C(37)-C(38) 120.3(6)

C(36)-C(37)-H(37) 119.9

C(38)-C(37)-H(37) 119.9

C(37)-C(38)-C(33) 120.6(5)

C(37)-C(38)-H(38) 119.7

C(33)-C(38)-H(38) 119.7

C(44)-C(39)-C(40) 119.0(5)

C(44)-C(39)-P(4) 120.4(4)

C(40)-C(39)-P(4) 120.3(4)

C(41)-C(40)-C(39) 120.0(5)

C(41)-C(40)-H(40) 120.0

C(39)-C(40)-H(40) 120.0

C(40)-C(41)-C(42) 120.0(5)

C(40)-C(41)-H(41) 120.0

C(42)-C(41)-H(41) 120.0

C(43)-C(42)-C(41) 120.4(6)

C(43)-C(42)-H(42) 119.8

C(41)-C(42)-H(42) 119.8

C(42)-C(43)-C(44) 119.9(5)

C(42)-C(43)-H(43) 120.1

C(44)-C(43)-H(43) 120.1

C(39)-C(44)-C(43) 120.6(5)

C(39)-C(44)-H(44) 119.7

C(43)-C(44)-H(44) 119.7

C(50)-C(45)-C(46) 118.9(5)

C(50)-C(45)-P(3) 119.9(4)

C(46)-C(45)-P(3) 121.0(4)

C(47)-C(46)-C(45) 120.2(5)

C(47)-C(46)-H(46) 119.9

C(45)-C(46)-H(46) 119.9

C(46)-C(47)-C(48) 120.4(5)

C(46)-C(47)-H(47) 119.8

C(48)-C(47)-H(47) 119.8

C(49)-C(48)-C(47) 119.9(5)

C(49)-C(48)-H(48) 120.0

C(47)-C(48)-H(48) 120.0

C(48)-C(49)-C(50) 119.9(5)

C(48)-C(49)-H(49) 120.1

C(50)-C(49)-H(49) 120.1

C(45)-C(50)-C(49) 120.7(5)

C(45)-C(50)-H(50) 119.6

C(49)-C(50)-H(50) 119.6

C(52)-C(51)-C(56) 118.1(5)

C(52)-C(51)-P(3) 121.9(4)

C(56)-C(51)-P(3) 119.8(4)

C(53)-C(52)-C(51) 120.6(5)

C(53)-C(52)-H(52) 119.7

C(51)-C(52)-H(52) 119.7

C(54)-C(53)-C(52) 119.8(5)

C(54)-C(53)-H(53) 120.1

C(52)-C(53)-H(53) 120.1

C(55)-C(54)-C(53) 120.6(5)

C(55)-C(54)-H(54) 119.7

C(53)-C(54)-H(54) 119.7

C(54)-C(55)-C(56) 119.9(5)

C(54)-C(55)-H(55) 120.0

C(56)-C(55)-H(55) 120.0

C(55)-C(56)-C(51) 121.0(5)

C(55)-C(56)-H(56) 119.5

C(51)-C(56)-H(56) 119.5

C(60)-O(60)-H(601) 88.4

O(60)-C(60)-H(60A) 109.5

O(60)-C(60)-H(60B) 109.5

H(60A)-C(60)-H(60B) 109.5

O(60)-C(60)-H(60C) 109.5

H(60A)-C(60)-H(60C) 109.5

H(60B)-C(60)-H(60C) 109.5

__________________________________________________

Symmetry transformations used to generate equivalent atoms:

**Table S10.** Anisotropic displacement parameters (Å2x 103)for structure 1b. The anisotropic

displacement factor exponent takes the form: -22[ h2a*2U11 + ... + 2 h k a* b* U12 ]

______________________________________________________________________________

U11 U22 U33 U23 U13 U12

______________________________________________________________________________

Pt(1) 20(1) 15(1) 29(1) -5(1) 10(1) -3(1)

Pt(2) 14(1) 13(1) 20(1) 0(1) 7(1) -1(1)

Rh(1) 14(1) 12(1) 22(1) 1(1) 7(1) 0(1)

Rh(2) 15(1) 12(1) 35(1) 2(1) 9(1) 1(1)

P(1) 17(1) 16(1) 35(1) 7(1) 11(1) 0(1)

P(2) 17(1) 14(1) 53(1) 7(1) 13(1) 2(1)

P(3) 15(1) 14(1) 16(1) 1(1) 5(1) 0(1)

P(4) 15(1) 14(1) 15(1) 1(1) 6(1) -1(1)

O(1) 53(3) 39(3) 32(3) -8(2) 4(2) -10(2)

O(2) 24(2) 27(2) 24(2) -2(2) 4(2) 4(2)

O(3) 25(3) 48(3) 65(4) -27(2) 19(2) -4(2)

O(4) 34(3) 48(3) 66(4) 9(2) 34(3) 2(2)

O(5) 20(2) 24(2) 30(3) 3(2) 4(2) 5(2)

O(6) 16(3) 54(3) 77(4) 10(2) 11(3) 5(2)

C(1) 26(4) 24(3) 31(4) -4(3) 11(3) -2(2)

C(2) 26(3) 9(3) 19(3) 0(2) 8(3) -4(2)

C(3) 27(4) 22(3) 51(4) -7(3) 19(3) -8(2)

C(4) 26(3) 19(3) 31(4) 1(2) 11(3) 2(2)

C(5) 17(3) 15(3) 30(4) 5(2) 12(3) 4(2)

C(6) 35(4) 17(3) 44(4) 3(2) 21(3) 2(2)

C(7) 16(3) 15(3) 52(4) 6(3) 10(3) 2(2)

C(8) 22(3) 9(3) 43(4) 7(2) 11(3) 1(2)

C(9) 22(3) 20(3) 53(5) -4(3) 14(3) -4(2)

C(10) 35(4) 18(3) 57(5) -8(3) 11(3) -2(2)

C(11) 17(3) 25(3) 66(5) 0(3) 8(3) -3(2)

C(12) 22(4) 30(3) 59(5) 12(3) 20(3) 2(2)

C(13) 25(3) 16(3) 46(4) 11(3) 15(3) 1(2)

C(14) 21(3) 15(3) 73(5) 4(3) 19(3) 5(2)

C(15) 26(4) 19(3) 69(5) 8(3) 18(3) -1(2)

C(16) 39(4) 19(3) 96(7) -4(3) 22(4) -2(3)

C(17) 46(5) 24(4) 207(12) -30(5) 61(6) -3(3)

C(18) 47(5) 32(4) 279(16) -50(7) 89(8) -13(3)

C(19) 31(4) 22(4) 178(10) -18(5) 50(5) -3(3)

C(20) 18(3) 33(4) 65(5) 21(3) 10(3) 4(2)

C(21) 44(5) 44(4) 66(6) 27(4) -5(4) -6(3)

C(22) 45(5) 63(6) 88(8) 44(5) 5(5) -1(4)

C(23) 27(4) 85(6) 65(6) 45(5) 19(4) 16(4)

C(24) 41(5) 60(5) 42(5) 16(4) 12(4) 8(3)

C(25) 34(4) 41(4) 43(5) 15(3) 9(3) 9(3)

C(26) 17(3) 32(3) 41(4) 17(3) 13(3) 8(2)

C(27) 27(4) 37(4) 55(5) 21(3) 18(3) 8(3)

C(28) 44(5) 61(5) 46(5) 37(4) 29(4) 17(3)

C(29) 39(5) 77(6) 28(4) 17(4) 12(4) 18(4)

C(30) 38(4) 54(4) 29(4) 8(3) 14(3) 8(3)

C(31) 33(4) 31(3) 28(4) 10(3) 14(3) 9(2)

C(32) 17(3) 16(3) 14(3) 1(2) 1(2) 2(2)

C(33) 15(3) 11(2) 19(3) 5(2) -2(2) 2(2)

C(34) 25(3) 17(3) 30(4) -2(2) 11(3) 2(2)

C(35) 34(4) 18(3) 35(4) -7(2) -1(3) 1(2)

C(36) 31(4) 19(3) 41(4) 6(3) 10(3) -3(2)

C(37) 27(4) 27(3) 25(4) 4(2) 3(3) -5(2)

C(38) 24(3) 22(3) 16(3) -2(2) 4(3) -5(2)

C(39) 12(3) 19(3) 17(3) -1(2) 8(2) -3(2)

C(40) 20(3) 26(3) 17(3) -1(2) 4(3) 7(2)

C(41) 18(3) 41(4) 26(4) 7(3) 6(3) 6(2)

C(42) 16(3) 44(4) 19(3) 2(3) 5(3) -10(2)

C(43) 28(4) 30(3) 22(4) -4(2) 2(3) -12(2)

C(44) 23(3) 21(3) 22(3) 5(2) 9(3) -2(2)

C(45) 18(3) 20(3) 10(3) 2(2) 3(2) 2(2)

C(46) 20(3) 25(3) 17(3) -4(2) 7(2) 1(2)

C(47) 26(3) 28(3) 18(3) -1(2) 4(3) 8(2)

C(48) 18(3) 45(4) 10(3) 6(2) 7(2) 5(2)

C(49) 26(3) 31(3) 18(3) 5(2) 9(3) -3(2)

C(50) 19(3) 21(3) 15(3) 4(2) 7(2) 2(2)

C(51) 18(3) 10(2) 18(3) -1(2) 1(2) 1(2)

C(52) 17(3) 26(3) 22(3) 2(2) 5(3) 1(2)

C(53) 30(4) 29(3) 16(3) -4(2) 8(3) 1(2)

C(54) 27(3) 19(3) 24(3) -4(2) 1(3) -3(2)

C(55) 20(3) 22(3) 23(3) -2(2) 4(3) -1(2)

C(56) 19(3) 18(3) 19(3) 3(2) 3(2) 2(2)

O(60) 74(10) 28(6) 310(30) -1(10) 91(12) -2(6)

C(60) 77(15) 69(13) 140(20) 36(13) -29(14) 41(11)

______________________________________________________________________________

**Table S11.** Hydrogen coordinates ( x 104) and isotropic displacement parameters (Å2x 103)

for structure 1b.

________________________________________________________________________________

x y z U(eq)

________________________________________________________________________________

H(7A) 8901 4895 3394 33

H(7B) 8695 5038 2258 33

H(9) 10414 4531 4119 37

H(10) 12096 4711 4541 43

H(11) 13096 4639 3346 43

H(12) 12399 4409 1765 43

H(13) 10717 4255 1336 34

H(15) 8324 5644 3330 44

H(16) 7963 6324 4090 60

H(17) 6456 6407 4616 105

H(18) 5290 5804 4355 134

H(19) 5629 5142 3539 88

H(21) 7024 5614 1494 64

H(22) 6541 5774 -142 80

H(23) 5965 5199 -1251 69

H(24) 5815 4449 -682 57

H(25) 6259 4287 993 47

H(27) 9097 4892 771 46

H(28) 8764 4830 -930 57

H(29) 8232 4138 -1680 57

H(30) 8067 3493 -709 47

H(31) 8386 3551 982 35

H(32A) 8949 2229 3630 19

H(32B) 9629 2575 4361 19

H(34) 7720 1807 3276 28

H(35) 6633 1179 3139 36

H(36) 5563 1081 4233 36

H(37) 5545 1616 5475 31

H(38) 6555 2262 5590 25

H(40) 9126 1938 5826 25

H(41) 10110 1939 7401 34

H(42) 10236 2602 8368 31

H(43) 9381 3264 7772 33

H(44) 8378 3265 6204 26

H(46) 10157 2172 2472 24

H(47) 11825 2061 2412 29

H(48) 12919 2685 2594 28

H(49) 12336 3423 2821 29

H(50) 10669 3534 2915 21

H(52) 9250 2689 908 26

H(53) 8233 2364 -468 29

H(54) 6638 2120 -368 29

H(55) 6031 2219 1075 26

H(56) 7005 2571 2425 22

H(601) 10100 1200 3307 60

H(60A) 10587 1825 4616 150

H(60B) 11097 1392 4204 150

H(60C) 10344 1317 4943 150

________________________________________________________________________________

**Table S12.** Torsion angles [°] for structure 1b.

C(1)-Pt(1)-Pt(2)-C(4) 64.9(3)

C(3)-Pt(1)-Pt(2)-C(4) -36.8(3)

C(2)-Pt(1)-Pt(2)-C(4) 154.9(2)

Rh(1)-Pt(1)-Pt(2)-C(4) -160.0(2)

Rh(2)-Pt(1)-Pt(2)-C(4) -84.6(2)

C(1)-Pt(1)-Pt(2)-P(4) -53.8(2)

C(3)-Pt(1)-Pt(2)-P(4) -155.49(19)

C(2)-Pt(1)-Pt(2)-P(4) 36.20(15)

Rh(1)-Pt(1)-Pt(2)-P(4) 81.31(4)

Rh(2)-Pt(1)-Pt(2)-P(4) 156.63(4)

C(1)-Pt(1)-Pt(2)-Rh(1) -135.1(2)

C(3)-Pt(1)-Pt(2)-Rh(1) 123.20(19)

C(2)-Pt(1)-Pt(2)-Rh(1) -45.12(15)

Rh(2)-Pt(1)-Pt(2)-Rh(1) 75.320(16)

C(1)-Pt(1)-Pt(2)-Rh(2) 149.5(2)

C(3)-Pt(1)-Pt(2)-Rh(2) 47.88(19)

C(2)-Pt(1)-Pt(2)-Rh(2) -120.44(15)

Rh(1)-Pt(1)-Pt(2)-Rh(2) -75.320(16)

C(4)-Pt(2)-Rh(1)-C(2) 118.2(6)

P(4)-Pt(2)-Rh(1)-C(2) -64.22(14)

Rh(2)-Pt(2)-Rh(1)-C(2) 114.84(14)

Pt(1)-Pt(2)-Rh(1)-C(2) 47.81(14)

C(4)-Pt(2)-Rh(1)-C(5) -53.4(6)

P(4)-Pt(2)-Rh(1)-C(5) 124.20(16)

Rh(2)-Pt(2)-Rh(1)-C(5) -56.74(15)

Pt(1)-Pt(2)-Rh(1)-C(5) -123.77(15)

C(4)-Pt(2)-Rh(1)-P(3) -150.1(6)

P(4)-Pt(2)-Rh(1)-P(3) 27.52(5)

Rh(2)-Pt(2)-Rh(1)-P(3) -153.42(4)

Pt(1)-Pt(2)-Rh(1)-P(3) 139.55(4)

C(4)-Pt(2)-Rh(1)-P(1) 2.7(6)

P(4)-Pt(2)-Rh(1)-P(1) -179.64(11)

Rh(2)-Pt(2)-Rh(1)-P(1) -0.58(10)

Pt(1)-Pt(2)-Rh(1)-P(1) -67.61(10)

C(4)-Pt(2)-Rh(1)-Pt(1) 70.4(6)

P(4)-Pt(2)-Rh(1)-Pt(1) -112.03(4)

Rh(2)-Pt(2)-Rh(1)-Pt(1) 67.032(14)

C(4)-Pt(2)-Rh(1)-Rh(2) 3.3(6)

P(4)-Pt(2)-Rh(1)-Rh(2) -179.06(4)

Pt(1)-Pt(2)-Rh(1)-Rh(2) -67.032(14)

C(1)-Pt(1)-Rh(1)-C(2) 7.2(3)

C(3)-Pt(1)-Rh(1)-C(2) -170.3(2)

Rh(2)-Pt(1)-Rh(1)-C(2) -176.16(17)

Pt(2)-Pt(1)-Rh(1)-C(2) -109.94(17)

C(1)-Pt(1)-Rh(1)-C(5) 174.6(3)

C(3)-Pt(1)-Rh(1)-C(5) -2.8(2)

C(2)-Pt(1)-Rh(1)-C(5) 167.5(2)

Rh(2)-Pt(1)-Rh(1)-C(5) -8.71(15)

Pt(2)-Pt(1)-Rh(1)-C(5) 57.52(15)

C(1)-Pt(1)-Rh(1)-P(3) 46.7(3)

C(3)-Pt(1)-Rh(1)-P(3) -130.77(17)

C(2)-Pt(1)-Rh(1)-P(3) 39.53(18)

Rh(2)-Pt(1)-Rh(1)-P(3) -136.63(5)

Pt(2)-Pt(1)-Rh(1)-P(3) -70.41(5)

C(1)-Pt(1)-Rh(1)-P(1) -87.1(3)

C(3)-Pt(1)-Rh(1)-P(1) 95.44(17)

C(2)-Pt(1)-Rh(1)-P(1) -94.27(17)

Rh(2)-Pt(1)-Rh(1)-P(1) 89.57(4)

Pt(2)-Pt(1)-Rh(1)-P(1) 155.80(4)

C(1)-Pt(1)-Rh(1)-Pt(2) 117.1(3)

C(3)-Pt(1)-Rh(1)-Pt(2) -60.36(17)

C(2)-Pt(1)-Rh(1)-Pt(2) 109.94(17)

Rh(2)-Pt(1)-Rh(1)-Pt(2) -66.222(12)

C(1)-Pt(1)-Rh(1)-Rh(2) -176.7(3)

C(3)-Pt(1)-Rh(1)-Rh(2) 5.86(17)

C(2)-Pt(1)-Rh(1)-Rh(2) 176.16(17)

Pt(2)-Pt(1)-Rh(1)-Rh(2) 66.222(12)

C(4)-Pt(2)-Rh(2)-C(6) -33.5(3)

P(4)-Pt(2)-Rh(2)-C(6) 147.7(2)

Rh(1)-Pt(2)-Rh(2)-C(6) 145.4(2)

Pt(1)-Pt(2)-Rh(2)-C(6) -147.9(2)

C(4)-Pt(2)-Rh(2)-C(3) 67.5(2)

P(4)-Pt(2)-Rh(2)-C(3) -111.33(18)

Rh(1)-Pt(2)-Rh(2)-C(3) -113.60(16)

Pt(1)-Pt(2)-Rh(2)-C(3) -46.89(16)

C(4)-Pt(2)-Rh(2)-C(5) -125.7(2)

P(4)-Pt(2)-Rh(2)-C(5) 55.45(18)

Rh(1)-Pt(2)-Rh(2)-C(5) 53.18(16)

Pt(1)-Pt(2)-Rh(2)-C(5) 119.89(16)

C(4)-Pt(2)-Rh(2)-P(2) 172.1(2)

P(4)-Pt(2)-Rh(2)-P(2) -6.74(15)

Rh(1)-Pt(2)-Rh(2)-P(2) -9.01(11)

Pt(1)-Pt(2)-Rh(2)-P(2) 57.71(11)

C(4)-Pt(2)-Rh(2)-Rh(1) -178.89(19)

P(4)-Pt(2)-Rh(2)-Rh(1) 2.27(9)

Pt(1)-Pt(2)-Rh(2)-Rh(1) 66.715(13)

C(4)-Pt(2)-Rh(2)-Pt(1) 114.39(19)

P(4)-Pt(2)-Rh(2)-Pt(1) -64.44(9)

Rh(1)-Pt(2)-Rh(2)-Pt(1) -66.715(13)

C(2)-Rh(1)-Rh(2)-C(6) -146.3(3)

C(5)-Rh(1)-Rh(2)-C(6) 20.2(4)

P(3)-Rh(1)-Rh(2)-C(6) -20.5(3)

P(1)-Rh(1)-Rh(2)-C(6) 112.0(3)

Pt(2)-Rh(1)-Rh(2)-C(6) -67.7(3)

Pt(1)-Rh(1)-Rh(2)-C(6) -149.6(3)

C(2)-Rh(1)-Rh(2)-C(3) -2.6(2)

C(5)-Rh(1)-Rh(2)-C(3) 163.9(2)

P(3)-Rh(1)-Rh(2)-C(3) 123.20(17)

P(1)-Rh(1)-Rh(2)-C(3) -104.31(17)

Pt(2)-Rh(1)-Rh(2)-C(3) 75.95(16)

Pt(1)-Rh(1)-Rh(2)-C(3) -5.88(16)

C(2)-Rh(1)-Rh(2)-C(5) -166.5(2)

P(3)-Rh(1)-Rh(2)-C(5) -40.65(19)

P(1)-Rh(1)-Rh(2)-C(5) 91.84(18)

Pt(2)-Rh(1)-Rh(2)-C(5) -87.90(18)

Pt(1)-Rh(1)-Rh(2)-C(5) -169.73(18)

C(2)-Rh(1)-Rh(2)-P(2) 97.58(15)

C(5)-Rh(1)-Rh(2)-P(2) -95.96(19)

P(3)-Rh(1)-Rh(2)-P(2) -136.61(8)

P(1)-Rh(1)-Rh(2)-P(2) -4.12(6)

Pt(2)-Rh(1)-Rh(2)-P(2) 176.14(5)

Pt(1)-Rh(1)-Rh(2)-P(2) 94.31(5)

C(2)-Rh(1)-Rh(2)-Pt(2) -78.56(14)

C(5)-Rh(1)-Rh(2)-Pt(2) 87.90(18)

P(3)-Rh(1)-Rh(2)-Pt(2) 47.25(6)

P(1)-Rh(1)-Rh(2)-Pt(2) 179.75(4)

Pt(1)-Rh(1)-Rh(2)-Pt(2) -81.829(13)

C(2)-Rh(1)-Rh(2)-Pt(1) 3.27(14)

C(5)-Rh(1)-Rh(2)-Pt(1) 169.73(18)

P(3)-Rh(1)-Rh(2)-Pt(1) 129.08(6)

P(1)-Rh(1)-Rh(2)-Pt(1) -98.43(4)

Pt(2)-Rh(1)-Rh(2)-Pt(1) 81.829(13)

C(1)-Pt(1)-Rh(2)-C(6) -39.6(5)

C(3)-Pt(1)-Rh(2)-C(6) -27.7(4)

C(2)-Pt(1)-Rh(2)-C(6) 142.0(3)

Rh(1)-Pt(1)-Rh(2)-C(6) 145.0(3)

Pt(2)-Pt(1)-Rh(2)-C(6) 79.3(3)

C(1)-Pt(1)-Rh(2)-C(3) -11.9(5)

C(2)-Pt(1)-Rh(2)-C(3) 169.7(2)

Rh(1)-Pt(1)-Rh(2)-C(3) 172.7(2)

Pt(2)-Pt(1)-Rh(2)-C(3) 107.0(2)

C(1)-Pt(1)-Rh(2)-C(5) -176.6(4)

C(3)-Pt(1)-Rh(2)-C(5) -164.7(2)

C(2)-Pt(1)-Rh(2)-C(5) 5.02(19)

Rh(1)-Pt(1)-Rh(2)-C(5) 8.00(14)

Pt(2)-Pt(1)-Rh(2)-C(5) -57.69(14)

C(1)-Pt(1)-Rh(2)-P(2) 82.5(4)

C(3)-Pt(1)-Rh(2)-P(2) 94.3(2)

C(2)-Pt(1)-Rh(2)-P(2) -95.94(14)

Rh(1)-Pt(1)-Rh(2)-P(2) -92.96(4)

Pt(2)-Pt(1)-Rh(2)-P(2) -158.66(4)

C(1)-Pt(1)-Rh(2)-Pt(2) -118.9(4)

C(3)-Pt(1)-Rh(2)-Pt(2) -107.0(2)

C(2)-Pt(1)-Rh(2)-Pt(2) 62.71(13)

Rh(1)-Pt(1)-Rh(2)-Pt(2) 65.693(12)

C(1)-Pt(1)-Rh(2)-Rh(1) 175.4(4)

C(3)-Pt(1)-Rh(2)-Rh(1) -172.7(2)

C(2)-Pt(1)-Rh(2)-Rh(1) -2.98(13)

Pt(2)-Pt(1)-Rh(2)-Rh(1) -65.693(12)

C(2)-Rh(1)-P(1)-C(26) 153.6(3)

C(5)-Rh(1)-P(1)-C(26) -40.8(3)

P(3)-Rh(1)-P(1)-C(26) 58.3(2)

Pt(2)-Rh(1)-P(1)-C(26) -92.5(2)

Pt(1)-Rh(1)-P(1)-C(26) -153.7(2)

Rh(2)-Rh(1)-P(1)-C(26) -93.0(2)

C(2)-Rh(1)-P(1)-C(8) 25.9(3)

C(5)-Rh(1)-P(1)-C(8) -168.5(3)

P(3)-Rh(1)-P(1)-C(8) -69.4(2)

Pt(2)-Rh(1)-P(1)-C(8) 139.8(2)

Pt(1)-Rh(1)-P(1)-C(8) 78.6(2)

Rh(2)-Rh(1)-P(1)-C(8) 139.2(2)

C(2)-Rh(1)-P(1)-C(7) -87.1(3)

C(5)-Rh(1)-P(1)-C(7) 78.4(3)

P(3)-Rh(1)-P(1)-C(7) 177.6(2)

Pt(2)-Rh(1)-P(1)-C(7) 26.7(3)

Pt(1)-Rh(1)-P(1)-C(7) -34.4(2)

Rh(2)-Rh(1)-P(1)-C(7) 26.2(2)

C(6)-Rh(2)-P(2)-C(14) 78.7(3)

C(3)-Rh(2)-P(2)-C(14) -24.1(3)

C(5)-Rh(2)-P(2)-C(14) 177.1(3)

Pt(2)-Rh(2)-P(2)-C(14) -126.6(2)

Rh(1)-Rh(2)-P(2)-C(14) -134.4(2)

Pt(1)-Rh(2)-P(2)-C(14) -74.2(2)

C(6)-Rh(2)-P(2)-C(20) -47.2(3)

C(3)-Rh(2)-P(2)-C(20) -150.0(3)

C(5)-Rh(2)-P(2)-C(20) 51.2(3)

Pt(2)-Rh(2)-P(2)-C(20) 107.4(3)

Rh(1)-Rh(2)-P(2)-C(20) 99.7(2)

Pt(1)-Rh(2)-P(2)-C(20) 159.9(2)

C(6)-Rh(2)-P(2)-C(7) -165.6(3)

C(3)-Rh(2)-P(2)-C(7) 91.6(3)

C(5)-Rh(2)-P(2)-C(7) -67.2(3)

Pt(2)-Rh(2)-P(2)-C(7) -11.0(3)

Rh(1)-Rh(2)-P(2)-C(7) -18.7(2)

Pt(1)-Rh(2)-P(2)-C(7) 41.5(2)

C(2)-Rh(1)-P(3)-C(51) 172.1(2)

C(5)-Rh(1)-P(3)-C(51) 9.6(2)

P(1)-Rh(1)-P(3)-C(51) -87.5(2)

Pt(2)-Rh(1)-P(3)-C(51) 80.23(19)

Pt(1)-Rh(1)-P(3)-C(51) 142.04(19)

Rh(2)-Rh(1)-P(3)-C(51) 40.8(2)

C(2)-Rh(1)-P(3)-C(45) -59.4(2)

C(5)-Rh(1)-P(3)-C(45) 138.1(2)

P(1)-Rh(1)-P(3)-C(45) 41.0(2)

Pt(2)-Rh(1)-P(3)-C(45) -151.3(2)

Pt(1)-Rh(1)-P(3)-C(45) -89.5(2)

Rh(2)-Rh(1)-P(3)-C(45) 169.28(19)

C(2)-Rh(1)-P(3)-C(32) 53.5(2)

C(5)-Rh(1)-P(3)-C(32) -109.0(2)

P(1)-Rh(1)-P(3)-C(32) 153.93(18)

Pt(2)-Rh(1)-P(3)-C(32) -38.38(18)

Pt(1)-Rh(1)-P(3)-C(32) 23.4(2)

Rh(2)-Rh(1)-P(3)-C(32) -77.82(19)

C(4)-Pt(2)-P(4)-C(39) -80.0(3)

Rh(1)-Pt(2)-P(4)-C(39) 100.83(17)

Rh(2)-Pt(2)-P(4)-C(39) 98.83(19)

Pt(1)-Pt(2)-P(4)-C(39) 45.24(18)

C(4)-Pt(2)-P(4)-C(33) 40.2(3)

Rh(1)-Pt(2)-P(4)-C(33) -139.0(2)

Rh(2)-Pt(2)-P(4)-C(33) -141.0(2)

Pt(1)-Pt(2)-P(4)-C(33) 165.5(2)

C(4)-Pt(2)-P(4)-C(32) 164.7(3)

Rh(1)-Pt(2)-P(4)-C(32) -14.48(19)

Rh(2)-Pt(2)-P(4)-C(32) -16.5(2)

Pt(1)-Pt(2)-P(4)-C(32) -70.07(19)

C(3)-Pt(1)-C(1)-O(1) 162(7)

C(2)-Pt(1)-C(1)-O(1) -10(8)

Rh(1)-Pt(1)-C(1)-O(1) -16(8)

Rh(2)-Pt(1)-C(1)-O(1) 171(7)

Pt(2)-Pt(1)-C(1)-O(1) 72(8)

C(5)-Rh(1)-C(2)-O(2) 136.7(7)

P(3)-Rh(1)-C(2)-O(2) 19.8(7)

P(1)-Rh(1)-C(2)-O(2) -91.3(7)

Pt(2)-Rh(1)-C(2)-O(2) 112.3(7)

Pt(1)-Rh(1)-C(2)-O(2) 173.8(8)

Rh(2)-Rh(1)-C(2)-O(2) 170.2(7)

C(5)-Rh(1)-C(2)-Pt(1) -37.1(6)

P(3)-Rh(1)-C(2)-Pt(1) -154.01(11)

P(1)-Rh(1)-C(2)-Pt(1) 94.88(11)

Pt(2)-Rh(1)-C(2)-Pt(1) -61.54(11)

Rh(2)-Rh(1)-C(2)-Pt(1) -3.61(16)

C(1)-Pt(1)-C(2)-O(2) 9.0(6)

C(3)-Pt(1)-C(2)-O(2) -152.7(5)

Rh(1)-Pt(1)-C(2)-O(2) -175.2(6)

Rh(2)-Pt(1)-C(2)-O(2) -171.7(5)

Pt(2)-Pt(1)-C(2)-O(2) -124.1(5)

C(1)-Pt(1)-C(2)-Rh(1) -175.8(2)

C(3)-Pt(1)-C(2)-Rh(1) 22.5(6)

Rh(2)-Pt(1)-C(2)-Rh(1) 3.48(16)

Pt(2)-Pt(1)-C(2)-Rh(1) 51.15(10)

C(6)-Rh(2)-C(3)-O(3) -9.4(8)

C(5)-Rh(2)-C(3)-O(3) -140.5(7)

P(2)-Rh(2)-C(3)-O(3) 92.8(7)

Pt(2)-Rh(2)-C(3)-O(3) -111.9(7)

Rh(1)-Rh(2)-C(3)-O(3) -168.2(7)

Pt(1)-Rh(2)-C(3)-O(3) -174.9(8)

C(6)-Rh(2)-C(3)-Pt(1) 165.49(19)

C(5)-Rh(2)-C(3)-Pt(1) 34.4(5)

P(2)-Rh(2)-C(3)-Pt(1) -92.34(14)

Pt(2)-Rh(2)-C(3)-Pt(1) 62.98(13)

Rh(1)-Rh(2)-C(3)-Pt(1) 6.66(18)

C(1)-Pt(1)-C(3)-O(3) -10.2(8)

C(2)-Pt(1)-C(3)-O(3) 150.8(6)

Rh(1)-Pt(1)-C(3)-O(3) 168.3(7)

Rh(2)-Pt(1)-C(3)-O(3) 174.9(8)

Pt(2)-Pt(1)-C(3)-O(3) 122.1(7)

C(1)-Pt(1)-C(3)-Rh(2) 174.8(2)

C(2)-Pt(1)-C(3)-Rh(2) -24.2(6)

Rh(1)-Pt(1)-C(3)-Rh(2) -6.66(19)

Pt(2)-Pt(1)-C(3)-Rh(2) -52.80(11)

P(4)-Pt(2)-C(4)-O(4) 78(29)

Rh(1)-Pt(2)-C(4)-O(4) -104(28)

Rh(2)-Pt(2)-C(4)-O(4) -101(29)

Pt(1)-Pt(2)-C(4)-O(4) -44(29)

C(2)-Rh(1)-C(5)-O(5) -140.5(7)

P(3)-Rh(1)-C(5)-O(5) -24.5(8)

P(1)-Rh(1)-C(5)-O(5) 86.9(7)

Pt(2)-Rh(1)-C(5)-O(5) -114.5(8)

Pt(1)-Rh(1)-C(5)-O(5) -171.3(7)

Rh(2)-Rh(1)-C(5)-O(5) 179.1(8)

C(2)-Rh(1)-C(5)-Rh(2) 40.4(6)

P(3)-Rh(1)-C(5)-Rh(2) 156.45(10)

P(1)-Rh(1)-C(5)-Rh(2) -92.25(12)

Pt(2)-Rh(1)-C(5)-Rh(2) 66.39(11)

Pt(1)-Rh(1)-C(5)-Rh(2) 9.61(17)

C(6)-Rh(2)-C(5)-O(5) 12.7(6)

C(3)-Rh(2)-C(5)-O(5) 144.5(5)

P(2)-Rh(2)-C(5)-O(5) -88.8(5)

Pt(2)-Rh(2)-C(5)-O(5) 113.6(6)

Rh(1)-Rh(2)-C(5)-O(5) -179.3(6)

Pt(1)-Rh(2)-C(5)-O(5) 171.4(5)

C(6)-Rh(2)-C(5)-Rh(1) -168.0(2)

C(3)-Rh(2)-C(5)-Rh(1) -36.2(5)

P(2)-Rh(2)-C(5)-Rh(1) 90.46(13)

Pt(2)-Rh(2)-C(5)-Rh(1) -67.07(12)

Pt(1)-Rh(2)-C(5)-Rh(1) -9.29(16)

C(3)-Rh(2)-C(6)-O(6) -162(13)

C(5)-Rh(2)-C(6)-O(6) -2(13)

P(2)-Rh(2)-C(6)-O(6) 98(13)

Pt(2)-Rh(2)-C(6)-O(6) -71(13)

Rh(1)-Rh(2)-C(6)-O(6) -17(13)

Pt(1)-Rh(2)-C(6)-O(6) -141(13)

C(14)-P(2)-C(7)-P(1) 165.5(4)

C(20)-P(2)-C(7)-P(1) -87.8(4)

Rh(2)-P(2)-C(7)-P(1) 42.5(4)

C(26)-P(1)-C(7)-P(2) 81.6(4)

C(8)-P(1)-C(7)-P(2) -172.4(3)

Rh(1)-P(1)-C(7)-P(2) -46.1(4)

C(26)-P(1)-C(8)-C(9) 167.5(4)

C(7)-P(1)-C(8)-C(9) 60.2(5)

Rh(1)-P(1)-C(8)-C(9) -57.9(5)

C(26)-P(1)-C(8)-C(13) -15.2(5)

C(7)-P(1)-C(8)-C(13) -122.6(5)

Rh(1)-P(1)-C(8)-C(13) 119.4(4)

C(13)-C(8)-C(9)-C(10) 1.6(8)

P(1)-C(8)-C(9)-C(10) 179.0(4)

C(8)-C(9)-C(10)-C(11) -1.7(8)

C(9)-C(10)-C(11)-C(12) 0.6(9)

C(10)-C(11)-C(12)-C(13) 0.5(9)

C(11)-C(12)-C(13)-C(8) -0.6(8)

C(9)-C(8)-C(13)-C(12) -0.4(8)

P(1)-C(8)-C(13)-C(12) -177.7(4)

C(20)-P(2)-C(14)-C(19) 88.0(7)

C(7)-P(2)-C(14)-C(19) -166.6(7)

Rh(2)-P(2)-C(14)-C(19) -47.0(7)

C(20)-P(2)-C(14)-C(15) -90.0(6)

C(7)-P(2)-C(14)-C(15) 15.4(7)

Rh(2)-P(2)-C(14)-C(15) 135.0(5)

C(19)-C(14)-C(15)-C(16) -0.6(11)

P(2)-C(14)-C(15)-C(16) 177.4(6)

C(14)-C(15)-C(16)-C(17) 1.3(13)

C(15)-C(16)-C(17)-C(18) -0.5(16)

C(16)-C(17)-C(18)-C(19) -0.9(19)

C(17)-C(18)-C(19)-C(14) 1.6(19)

C(15)-C(14)-C(19)-C(18) -0.9(15)

P(2)-C(14)-C(19)-C(18) -178.9(9)

C(14)-P(2)-C(20)-C(25) -152.3(5)

C(7)-P(2)-C(20)-C(25) 101.2(5)

Rh(2)-P(2)-C(20)-C(25) -21.2(6)

C(14)-P(2)-C(20)-C(21) 33.7(6)

C(7)-P(2)-C(20)-C(21) -72.9(6)

Rh(2)-P(2)-C(20)-C(21) 164.7(5)

C(25)-C(20)-C(21)-C(22) -0.7(11)

P(2)-C(20)-C(21)-C(22) 173.6(6)

C(20)-C(21)-C(22)-C(23) -0.9(13)

C(21)-C(22)-C(23)-C(24) 1.4(12)

C(22)-C(23)-C(24)-C(25) -0.3(11)

C(21)-C(20)-C(25)-C(24) 1.8(10)

P(2)-C(20)-C(25)-C(24) -172.5(5)

C(23)-C(24)-C(25)-C(20) -1.3(10)

C(8)-P(1)-C(26)-C(31) 117.0(5)

C(7)-P(1)-C(26)-C(31) -139.9(4)

Rh(1)-P(1)-C(26)-C(31) -18.4(5)

C(8)-P(1)-C(26)-C(27) -62.0(5)

C(7)-P(1)-C(26)-C(27) 41.1(5)

Rh(1)-P(1)-C(26)-C(27) 162.6(4)

C(31)-C(26)-C(27)-C(28) -0.3(9)

P(1)-C(26)-C(27)-C(28) 178.7(5)

C(26)-C(27)-C(28)-C(29) 0.4(10)

C(27)-C(28)-C(29)-C(30) -0.7(10)

C(28)-C(29)-C(30)-C(31) 0.9(10)

C(29)-C(30)-C(31)-C(26) -0.8(10)

C(27)-C(26)-C(31)-C(30) 0.5(9)

P(1)-C(26)-C(31)-C(30) -178.5(5)

C(39)-P(4)-C(32)-P(3) -132.9(3)

C(33)-P(4)-C(32)-P(3) 118.7(3)

Pt(2)-P(4)-C(32)-P(3) -10.5(3)

C(51)-P(3)-C(32)-P(4) -91.2(3)

C(45)-P(3)-C(32)-P(4) 162.8(3)

Rh(1)-P(3)-C(32)-P(4) 35.3(3)

C(39)-P(4)-C(33)-C(34) -125.6(5)

C(32)-P(4)-C(33)-C(34) -18.8(5)

Pt(2)-P(4)-C(33)-C(34) 109.0(4)

C(39)-P(4)-C(33)-C(38) 58.7(4)

C(32)-P(4)-C(33)-C(38) 165.5(4)

Pt(2)-P(4)-C(33)-C(38) -66.8(4)

C(38)-C(33)-C(34)-C(35) 0.3(8)

P(4)-C(33)-C(34)-C(35) -175.4(4)

C(33)-C(34)-C(35)-C(36) -1.2(9)

C(34)-C(35)-C(36)-C(37) 0.6(9)

C(35)-C(36)-C(37)-C(38) 1.1(9)

C(36)-C(37)-C(38)-C(33) -2.1(8)

C(34)-C(33)-C(38)-C(37) 1.4(8)

P(4)-C(33)-C(38)-C(37) 177.3(4)

C(33)-P(4)-C(39)-C(44) -136.6(4)

C(32)-P(4)-C(39)-C(44) 112.5(4)

Pt(2)-P(4)-C(39)-C(44) -9.8(5)

C(33)-P(4)-C(39)-C(40) 49.4(5)

C(32)-P(4)-C(39)-C(40) -61.5(4)

Pt(2)-P(4)-C(39)-C(40) 176.2(4)

C(44)-C(39)-C(40)-C(41) -0.1(8)

P(4)-C(39)-C(40)-C(41) 174.0(4)

C(39)-C(40)-C(41)-C(42) -0.2(8)

C(40)-C(41)-C(42)-C(43) 0.1(8)

C(41)-C(42)-C(43)-C(44) 0.2(8)

C(40)-C(39)-C(44)-C(43) 0.4(8)

P(4)-C(39)-C(44)-C(43) -173.6(4)

C(42)-C(43)-C(44)-C(39) -0.5(8)

C(51)-P(3)-C(45)-C(50) 132.9(4)

C(32)-P(3)-C(45)-C(50) -120.7(4)

Rh(1)-P(3)-C(45)-C(50) -1.5(5)

C(51)-P(3)-C(45)-C(46) -52.0(5)

C(32)-P(3)-C(45)-C(46) 54.5(5)

Rh(1)-P(3)-C(45)-C(46) 173.6(4)

C(50)-C(45)-C(46)-C(47) 0.7(8)

P(3)-C(45)-C(46)-C(47) -174.4(4)

C(45)-C(46)-C(47)-C(48) -0.6(8)

C(46)-C(47)-C(48)-C(49) -0.3(8)

C(47)-C(48)-C(49)-C(50) 1.0(8)

C(46)-C(45)-C(50)-C(49) 0.0(8)

P(3)-C(45)-C(50)-C(49) 175.2(4)

C(48)-C(49)-C(50)-C(45) -0.9(8)

C(45)-P(3)-C(51)-C(52) -25.0(5)

C(32)-P(3)-C(51)-C(52) -126.6(4)

Rh(1)-P(3)-C(51)-C(52) 111.6(4)

C(45)-P(3)-C(51)-C(56) 158.9(4)

C(32)-P(3)-C(51)-C(56) 57.3(4)

Rh(1)-P(3)-C(51)-C(56) -64.5(4)

C(56)-C(51)-C(52)-C(53) 0.2(7)

P(3)-C(51)-C(52)-C(53) -175.9(4)

C(51)-C(52)-C(53)-C(54) -1.4(8)

C(52)-C(53)-C(54)-C(55) 1.1(8)

C(53)-C(54)-C(55)-C(56) 0.4(8)

C(54)-C(55)-C(56)-C(51) -1.6(7)

C(52)-C(51)-C(56)-C(55) 1.3(7)

P(3)-C(51)-C(56)-C(55) 177.5(4)

___________________________________________________________________________________________________

Symmetry transformations used to generate equivalent atoms:
